1 **Control of Arabidopsis shoot stem cell homeostasis by two**  
2 **antagonistic CLE peptide signalling pathways**

3

4 Jenia Schlegel, Grégoire Denay, Karine Gustavo Pinto, Yvonne Stahl, Julia Schmid,  
5 Patrick Blümke, and Rüdiger Simon\*

6

7 Institute for Developmental Genetics and Cluster of Excellence on Plant Sciences,  
8 Heinrich Heine University, Universitätsstraße 1, 40225 Düsseldorf, Germany

9

10 \*Corresponding author; email: [ruediger.simon@hhu.de](mailto:ruediger.simon@hhu.de)

11

12 Keywords: shoot meristem, CLAVATA signalling, stem cells, CLE40, BAM1, WUS,  
13 shape

14

15 **Abstract**

16 Stem cell homeostasis in plant shoot meristems requires tight coordination between  
17 stem cell proliferation and cell differentiation. In Arabidopsis, stem cells express the  
18 secreted dodecapeptide CLAVATA3 (CLV3), which signals through the leucine-rich  
19 repeat (LRR)–receptor kinase CLAVATA1 (CLV1) and related CLV1-family members  
20 to downregulate expression of the homeodomain transcription factor *WUSCHEL*  
21 (*WUS*). *WUS* protein moves from cells below the stem cell domain to the meristem tip  
22 and promotes stem cell identity, together with *CLV3* expression, generating a negative  
23 feedback loop. How stem cell activity in the meristem centre is coordinated with organ  
24 initiation and cell differentiation at the periphery is unknown.

25 We show here that the *CLE40* gene, encoding a secreted peptide closely related  
26 to *CLV3*, is expressed in the SAM in differentiating cells in a pattern complementary to  
27 that of *CLV3*. *CLE40* promotes *WUS* expression via *BAM1*, a *CLV1*-family receptor,  
28 and *CLE40* expression is in turn repressed in a *WUS*-dependent manner. Together,  
29 *CLE40-BAM1-WUS* establish a second negative feedback loop. We propose that stem  
30 cell homeostasis is achieved through two intertwined pathways that adjust *WUS*  
31 activity and incorporate information on the size of the stem cell domain, via *CLV3*-  
32 *CLV1*, and on cell differentiation via *CLE40-BAM1*.

## 33 Introduction

34 In angiosperms, the stem cell domain in shoot meristem is controlled by the directional  
35 interplay of two adjacent groups of cells. These are the central zone (CZ) at the tip of  
36 the dome-shaped meristem, comprising slowly dividing stem cells, and the underlying  
37 cells of the organising centre (OC). Upon stem cell division, daughter cells are  
38 displaced laterally into the peripheral zone (PZ), where they can enter differentiation  
39 pathways (Fletcher et al., 1999; Hall & Watt, 1989; Reddy et al., 2004; Schnablová et  
40 al., 2020; Stahl & Simon, 2005; Steeves & Sussex, 1989). Cells in the OC express the  
41 homeodomain transcription factor *WUSCHEL* (*WUS*), which moves through  
42 plasmodesmata to CZ cells to maintain stem cell fate and promote expression of the  
43 secreted signalling peptide *CLAVATA3* (*CLV3*) (Brand et al., 2000; Daum et al., 2014;  
44 Müller et al., 2006; Schoof et al., 2000; Yadav et al., 2011). Perception of *CLV3* by  
45 plasma-membrane localised receptors in the OC cells triggers a signal transduction  
46 cascade and downregulates *WUS* activity, thus establishing a negative feedback loop  
47 (Mayer et al., 1998; Ogawa et al., 2008; Yadav et al., 2011). Mutants of *CLV3* or its  
48 receptors (see below) fail to confine *WUS* expression and cause stem cell proliferation,  
49 while *WUS* mutants cannot maintain an active stem cell population (Brand et al., 2002;  
50 Clark et al., 1993, 1995; Endrizzi et al., 1996; Laux et al., 1996; Schoof et al., 2000).  
51 *WUS* function in the OC is negative regulated by *HAM* transcription factors, and only  
52 *WUS* protein that moves upwards to the stem cell zone, which lacks *HAM* expression,  
53 can activate *CLV3* expression (Han et al., 2020; Zhou et al., 2018). The *CLV3-WUS*  
54 interaction can serve to maintain the relative sizes of the CZ and OC, and thereby  
55 meristem growth along the apical-basal axis. However, cell loss from the PZ due to  
56 production of lateral organs requires a compensatory size increase of the stem cell  
57 domain.

58 The CLV3 signalling pathway, which acts along the apical-basal axis of the meristem,  
59 has been widely studied in several plant species and shown to be crucial for stem cell  
60 homeostasis in shoot and floral meristems (Somssich et al., 2016). The CLV3 peptide  
61 is perceived by a leucine-rich-repeat (LRR) receptor kinase, CLAVATA1 (CLV1), which  
62 interacts with coreceptors of the CLAVATA3 INSENSITIVE RECEPTOR KINASES  
63 (CIK) 1-4 family (Clark et al., 1997; Cui et al., 2018). CLV1 activation involves  
64 autophosphorylation, interaction with membrane-associated and cytosolic kinases and  
65 phosphatases (Blümke et al., 2021; Defalco et al., 2021). Furthermore, heterotrimeric  
66 G-proteins and MAPKs have been implicated in this signal transduction cascade in  
67 maize and Arabidopsis (Betsuyaku et al., 2011; Bommert et al., 2013; Ishida et al.,  
68 2014; Lee et al., 2019). Besides CLV1, several other receptors contribute to WUS  
69 regulation, among them RECEPTOR-LIKE PROTEIN KINASE2 (RPK2), the  
70 CLAVATA2-CORYNE heteromer (CLV2-CRN) and BARELY ANY MERISTEM1-3  
71 (BAM1-3) (Bleckmann et al., 2010; DeYoung & Clark, 2008; Hord et al., 2006; Jeong  
72 et al., 1999; Kinoshita et al., 2010; Müller et al., 2008). The BAM receptors share high  
73 sequence similarity with CLV1, and perform diverse functions throughout plant  
74 development. Double mutants of *BAM1* and *BAM2* maintain smaller shoot and floral  
75 meristems, thus displaying the opposite phenotype to mutants of CLV1 (DeYoung et  
76 al., 2006; DeYoung & Clark, 2008; Hord et al., 2006). Interestingly, ectopic expression  
77 experiments showed that CLV1 and BAM1 can perform similar functions in stem cell  
78 control (Nimchuk et al., 2015). In addition, one study showed that CLV3 could interact  
79 with CLV1 and BAM1 in cell extracts (Shinohara & Matsubayashi, 2015), although  
80 another *in vitro* study did not detect *BAM1-CLV3* interaction at physiological levels of  
81 CLV3 (Crook et al., 2020). Furthermore, CLV1 was shown to act as a negative  
82 regulator of *BAM1* expression, which was interpreted as a genetic buffering system,  
83 whereby a loss of CLV1 is compensated by upregulation of BAM1 in the meristem

84 centre (Nimchuk, 2017; Nimchuk et al., 2015). Comparable genetic compensation  
85 models for CLE peptide signalling in stem cell homeostasis were established for other  
86 species, such as tomato and maize (Rodriguez-Leal et al., 2019).  
87 Maintaining the overall architecture of the shoot apical meristem during the entire life  
88 cycle of the plant requires replenishment of differentiating stem cell descendants in the  
89 PZ, indicating that cell division rates and cell fate changes in both regions are closely  
90 connected (Stahl & Simon, 2005). Overall meristem size is restricted by the ERECTA-  
91 family signalling pathway, which is activated by EPIDERMAL PATTERNING FACTOR  
92 (EPF)-LIKE (EPFL) ligands from the meristem periphery and confines both *CLV3* and  
93 *WUS* expression (Mandel et al., 2014; Shpak, 2013; Shpak et al., 2004; Torii et al.,  
94 1996; Zhang et al., 2021). In the land plant lineage, the shoot meristems of bryophytes  
95 such as the moss *Physcomitrium patens* appear less complex than those of  
96 angiosperms, and carry only a single apical stem cell which ensures organ initiation by  
97 continuous asymmetric cell divisions (de Keijzer et al., 2021; Harrison et al., 2009).  
98 Broadly expressed CLE peptides were here found to restrict stem cell identity, and act  
99 in division plane control (Whitewoods et al., 2018). Proliferation of the apical notch cell  
100 in the liverwort *Marchantia polymorpha* is promoted by MpCLE2 peptide which acts  
101 from outside the stem cell domain via the receptor MpCLV1, while cell proliferation is  
102 confined by MpCLE1 peptide through a different receptor (Hata & Kyoizuka, 2021;  
103 Hirakawa et al., 2019, 2020; Takahashi et al., 2021). Thus, antagonistic control of stem  
104 cell activities through diverse CLE peptides is conserved between distantly related land  
105 plants. In the grasses, several CLEs were found to control the stem cell domain. In  
106 maize, *ZmCLE7* is expressed from the meristem tip, while *ZmFCP1* is expressed in  
107 the meristem periphery and its centre. Both peptides restrict stem cell fate via  
108 independent receptor signalling pathways (Liu et al., 2021; Rodriguez-Leal et al.,  
109 2019). In rice, overexpression of the CLE peptides OsFCP1 and OsFCP2

110 downregulates the homeobox gene *OSH1* and arrests meristem function (Ohmori et  
111 al., 2013; Suzaki et al., 2008). Common for rice and maize, CLE peptide signalling  
112 restricts stem cell activities in the shoot meristem, but a stem cell promoting pathway  
113 were not been identified so far.

114       Importantly, how stem cell activities in the CZ and OC are coordinated to  
115 regulate organ initiation and cell differentiation in the PZ, which is crucial to maintain  
116 an active meristem, is not yet known. In maize, the CLV3-related peptide ZmFCP1 was  
117 suggested to be expressed in primordia, and convey a repressive signal on the stem  
118 cell domain (Je et al., 2016). In Arabidopsis, the most closely related peptide to CLV3  
119 is CLE40, which was shown to act in the root meristem to restrict columella stem cell  
120 fate and regulate the expression of the *WUS* paralog *WOX5* (Berckmans et al., 2020;  
121 Hobe et al., 2003; Pallakies & Simon, 2014; Stahl et al., 2013; Stahl & Simon, 2010).  
122 Functions of CLE40 in the SAM have not previously been described. Overexpression  
123 of *CLE40* causes shoot stem cell termination, while *CLE40* expression from the *CLV3*  
124 promoter fully complements the shoot and floral meristem defects of *clv3* mutants  
125 (Hobe et al., 2003). We therefore hypothesized that *CLE40* could act in a *CLV3*-related  
126 pathway in shoot stem cell control.

127       Here, we show that the expression level of *WUS* in the OC is subject to feedback  
128 regulation from the PZ, which is mediated by the secreted peptide CLE40. In the shoot  
129 meristem, *CLE40* is expressed in a complementary pattern to *CLV3*, and excluded  
130 from the CZ and OC. In *cle40* loss of function mutants, *WUS* expression is reduced,  
131 and shoot meristems remain small and flat, indicating that *CLE40* signalling is required  
132 to maintain *WUS* expression in the OC. Ectopic expression of *WUS* represses *CLE40*  
133 expression, while in *wus* loss-of-function mutants *CLE40* is expressed in the meristem  
134 centre, indicating that CLE40, in contrast to CLV3, is subject to negative feedback

135 regulation by WUS. CLE40 likely acts as an autocrine signal that is perceived by BAM1  
136 in a domain flanking the OC.  
137 Based on our findings, we propose a new model for the regulation of the stem cell  
138 domain in the shoot meristem in which signals and information from both, the CZ and  
139 the PZ are integrated through two interconnected negative feedback loops that sculpt  
140 the dome-shaped shoot meristems of angiosperms.

## 141 **Results**

### 142 **CLE40 signalling promotes IFM growth from the peripheral zone**

143 Previous studies showed that *CLE40* expression from the *CLV3* promoter can fully  
144 complement a *clv3-2* mutant, indicating that *CLE40* can substitute *CLV3* function in the  
145 shoot meristem to control stem cell homeostasis, if expressed from the stem cell  
146 domain. Furthermore, while all other *CLE* genes in Arabidopsis lack introns, the *CLE40*  
147 and *CLV3* genes carry two introns at very similar positions (Hobe et al., 2003).  
148 Phylogenetic analysis revealed that *CLV3* and *CLE40* locate in the same cluster  
149 together with *CLV3* orthologues from rice, maize and tomato (Goad et al., 2017) (Fig.  
150 1A).

151 Mutations in *CLE40* were previously found to affect distal stem cell maintenance in the  
152 root meristem, revealing that a *CLV3* related signalling pathway also operates in the  
153 root stem cell niche. To uncover a potential role of *CLE40* in shoot development, we  
154 analysed seedling and flower development, and inflorescence meristem (IFM) sizes of  
155 the wild type *Col-0*, and *clv3-9* and *cle40-2* loss-of-function mutants. At 4 weeks after  
156 germination (WAG), leaves of *clv3-9* mutants remained shorter than those of *Col-0* or  
157 *cle40-2* (Fig1-SupplFig.1). After floral induction, the inflorescences of *clv3-9* mutants  
158 were compact with many more flowers than the wild type, while *cle40-2* mutant  
159 inflorescences appeared smaller than the control (Fig. 1B-D). To first investigate  
160 effects on meristem development in detail, longitudinal optical sections through the  
161 inflorescence meristem (IFM) at 6 WAG were obtained by confocal microscopy and  
162 meristem areas were analysed (Fig. 1B-E). In *clv3-9* mutants, meristem areas  
163 increased to approx. 450% of wild type (*Col-0*) levels, while shoot meristems from 4  
164 independent *cle40* mutant alleles in a *Col-0* background (*cle40-2*, *cle40-cr1*, *cle40-cr2*,  
165 *cle40-cr3*) reached only up to 65% of wild type (Fig. 1E, Fig1-SupplFig.2C) (Yamaguchi  
166 et al., 2017). Next, we used carpel number as a rough proxy for flower meristem (FM)



167 size, which was  $2 \pm 0.0$  (N=290) in *Col-0* and *cle40-2* (N=290) but  $3.7 \pm 0.4$  (N=340) in  
 168 *clv3-9* (Fig1-SupplFig.3). Hence, we concluded that CLE40 mainly promotes IFM  
 169 growth, whereas CLV3 serves to restrict both IFM and FM sizes.

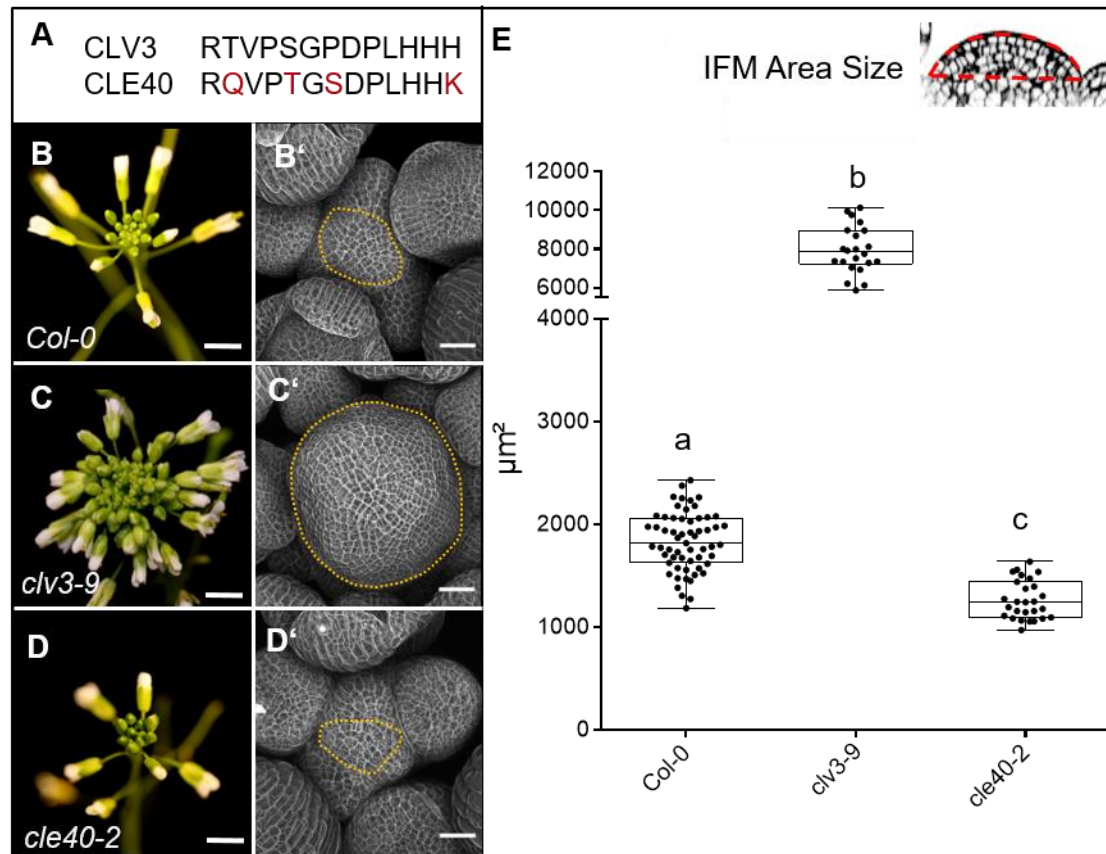

170

171 **Fig. 1: CLV3 and CLE40 exert opposite effects on meristem size**

172 **(A)** The amino acid (AA) sequences of the mature CLV3 and CLE40 peptides differ in four  
 173 AAs (differences marked in red). **(B)** *Col-0* inflorescence at 6 WAG with flowers. **(B')** IFM at 6  
 174 WAG, maximum intensity projection (MIP) of a z-stack taken by confocal microscopy. **(C)** *clv3-9*  
 175 9 inflorescence at 6 WAG **(C')** MIP of a *clv3-9* IFM at 6 WAG. **(D)** Inflorescence of *cle40-2* at  
 176 6 WAG **(D')** MIP of a *cle40-2* IFM. **(E)** Box and whisker plot of IFM sizes of *Col-0* (N=59), *clv3-9*  
 177 9 (N=22), and *cle40-2* (N=27) plants.

178 Scale bars: 10mm (B, C, D), 50µm (B', C', D'), Statistical groups were assigned after  
 179 calculating p-values by ANOVA and Turkey's multiple comparison test (differential grouping  
 180 from  $p \leq 0.01$ ). Yellow dotted lines in B' to D' enclose the IFM, red line in the inset meristem  
 181 in E indicates the area that was used for the quantifications in E.

182 We next analysed the precise *CLE40* expression pattern using a transcriptional  
183 reporter line, *CLE40:Venus-H2B* (Wink, 2013). We first concentrated on the IFMs and  
184 FMs. *CLE40* is expressed in IFMs and in FMs, starting at P5 to P6 onwards (Fig. 2A-  
185 C). We found stronger expression in the PZ than in the CZ, and no expression in young  
186 primordia. Using MorphoGraphX software, we extracted the fluorescence signal  
187 originating from the outermost cell layer (L1) of the IFM, and noted reduced *CLE40*  
188 expression in the CZ (Fig. 2B). Optical longitudinal sections through the IFM showed  
189 that *CLE40* is not expressed in the CZ, and only occasionally in the OC region (Fig.  
190 2C). Expression of *CLE40* changed dynamically during development: expression was  
191 concentrated in the IFM, but lacking at sites of primordia initiation (P0 to P4/5, Fig. 2C).  
192 In older primordia from P5/6 onwards, *CLE40* expression is detectable from the centre  
193 of the young FM and expands towards the FM periphery. In the FMs, *CLE40* is lacking  
194 in young sepal primordia (P6), but starts to be expressed on the adaxial sides of petals  
195 at P7 (Fig. 2A, P1-P7).

196 To compare the *CLE40* pattern with that of *CLV3*, we introgressed a  
197 *CLV3:NLS-3xmCherry* transcriptional reporter into the *CLE40:Venus-H2B*  
198 background. *CLV3* and *CLE40* are expressed in almost mutually exclusive domains of  
199 the IFM, with *CLV3* in the CZ surrounded by *CLE40* expressing cells (Fig. 2D-F"). In  
200 the deeper region of the IFM, where the OC is located, both *CLV3* and *CLE40* are not  
201 expressed (Fig. 2F).

202 We noted that *CLE40* is downregulated where *WUS* is expressed, or where *WUS*  
203 protein localises, such as the OC and CZ. Furthermore, *CLE40* is also lacking in very  
204 early flower primordia and in incipient organs.

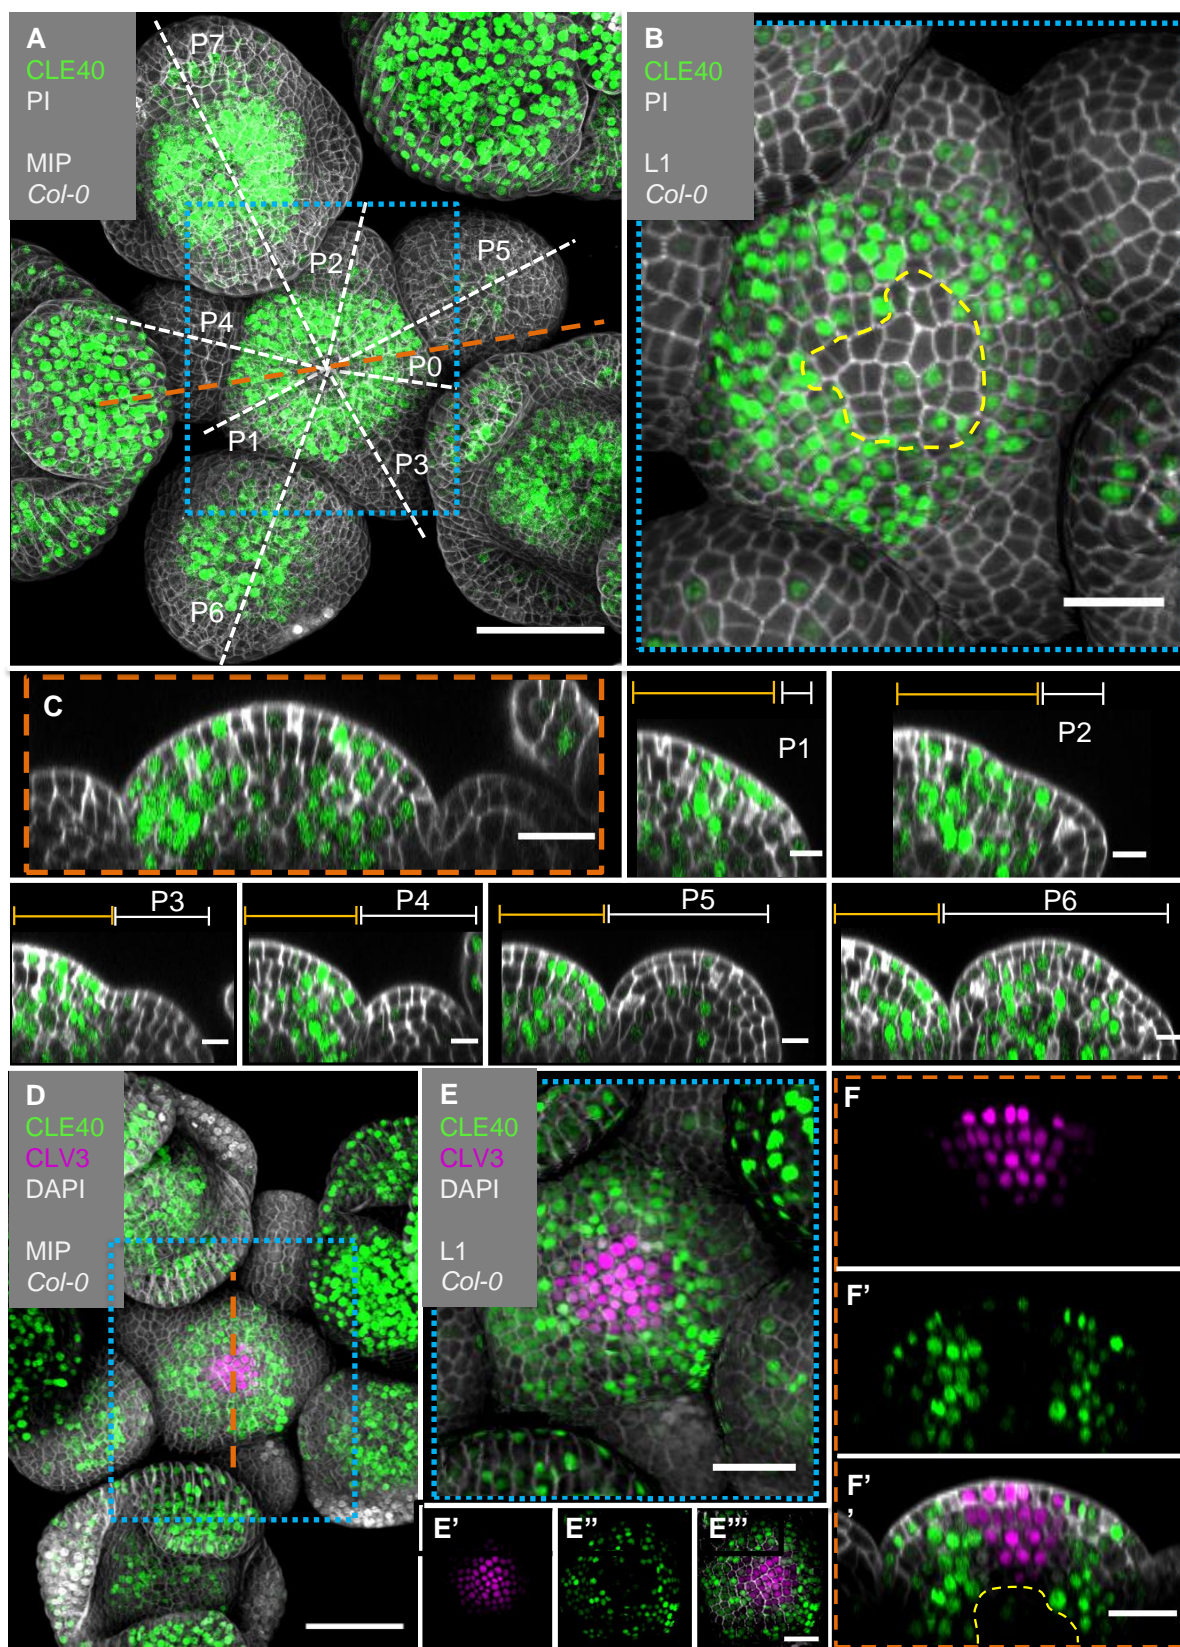

205

206 **Fig. 2: *CLE40* and *CLV3* show complementary expression patterns in the IFM**

207 **(A)** MIP of an inflorescence at 5 WAG expressing the transcriptional reporter  
 208 *CLE40:Venus-H2B/Col-0* showing *CLE40* expression in the IFM, older primordia and sepals



209 (N=23). **(B)** The L1 projection shows high expression in the epidermis of the periphery of the  
210 IFM and only weak expression in the CZ. **(C)** Longitudinal section through the IFM shows  
211 expression of *CLE40* in the periphery, but lack of expression in the CZ. **(P1 –P6)** Longitudinal  
212 section through primordia show no *CLE40* expression in young primordia (P1-P4), but in the  
213 centre of older primordia (P5-P6). **(D)** The MIP of the double reporter line of *CLE40* and *CLV3*  
214 (*CLE40:Venus-H2B;CLV3:NLS-3xmCherry//Col-0*) shows *CLV3* expression in the CZ  
215 surrounded by *CLE40* expression in the periphery (N=12). **(E-E''')** The L1 projection shows  
216 *CLV3* **(E')** expression in the centre of the IFM and *CLE40* **(E'')** expression in a distinct  
217 complementary pattern in the periphery of the IFM. **(F)** The longitudinal section through the  
218 centre of the IFM shows *CLV3* expression in the CZ while *CLE40* **(F')** is mostly expressed in  
219 the surrounding cells. **(F'')** *CLE40* and *CLV3* are expressed in complementary patterns.  
220 Dashed blue lines indicate magnified areas, dashed white and orange lines indicate planes of  
221 optical sections, dashed yellow line in B marks CZ and in F'' the OC. Scale bars: 50µm (A, D),  
222 20µm (B, C, E, E'', F''), 10µm (P0 to P6), MIP = Maximum intensity projection, PI = Propidium  
223 iodide, L1 = visualisation of layer 1 only, P1 to P7 = primordia at consecutive stages.

224

### 225 ***CLE40* expression is repressed by *WUS* activity**

226 To further analyse the regulation of *CLE40* expression, we introduced the *CLE40*  
227 transcriptional reporter into the *clv3-9* mutant background (Fig. 3A-B, Fig3-SupplFig.1).  
228 In *clv3-9* mutants, *WUS* is no longer repressed by the *CLV* signalling pathway, and the  
229 CZ of the meristem increases in size as described previously (Clark et al., 1995). In  
230 the *clv3-9* mutant meristems, both *CLV3* and *WUS* promoter activity is now found in  
231 an expanded domain (Fig3-SupplFig.1). *CLE40* is not expressed in the tip and centre  
232 of the IFM but is rather confined to the peripheral domain, where neither *CLV3* nor  
233 *WUS* are expressed (Fig. 3B', Fig3-SupplFig.1B'). To further explore the expression  
234 dynamics of *CLE40* in connection with regulation of stem cell fate and *WUS*, we  
235 misexpressed *WUS* from the *CLV3* promoter and introgressed it into plants carrying

236 the *CLE40:Venus-H2B* construct. Since *WUS* activates the *CLV3* promoter,  
237 *CLV3:WUS* misexpression triggers a positive feedback loop. This results in a  
238 continuous enlargement of the CZ (Brand et al., 2002). Young seedlings carrying the  
239 *CLV3:WUS* transgene at 10 DAG displayed a drastically enlarged SAM, compared to  
240 wild type seedlings of the same age (Fig. 3C-D'). Wild type seedlings at this stage  
241 express *CLE40* in older leaf primordia and in deeper regions of the vegetative SAM  
242 (Fig. 3E-E'). The *CLV3:WUS* transgenic seedlings do not initiate lateral organs from  
243 the expanded meristem, and *CLE40* expression is confined to the cotyledons (Fig. 3F-  
244 F'). *CLE40* is also lacking in the deeper regions of the vegetative SAM (Fig. 3F'). Thus,  
245 we conclude that either *WUS* itself, or a *WUS*-dependent regulatory pathway  
246 represses *CLE40* gene expression.

247 We next determined if *CLE40* repression in the CZ can be alleviated in mutants  
248 with reduced *WUS* activity. Since *wus* loss-of-function mutants fail to maintain an  
249 active CZ and shoot meristem, we used the hypomorphic *wus-7* allele (Graf et al.,  
250 2010; Ma et al., 2019). *wus-7* mutants are developmentally delayed. Furthermore,  
251 *wus-7* mutants generate an IFM, but the FMs give rise to sterile flowers that lack inner  
252 organs (Fig3-SupplFig.2). We introgressed the *CLE40* reporter into *wus-7*, and found  
253 that at 5WAG, all *wus-7* mutants expressed *CLE40* in both the CZ and the OC of the  
254 IFM (Fig. 3G-H', Fig3-SupplFig.2). Similar to wild type, *CLE40* is only weakly  
255 expressed in the young primordia of *wus-7*. Therefore, we conclude that a *WUS*-  
256 dependent pathway downregulates *CLE40* in the centre of the IFM during normal  
257 development.

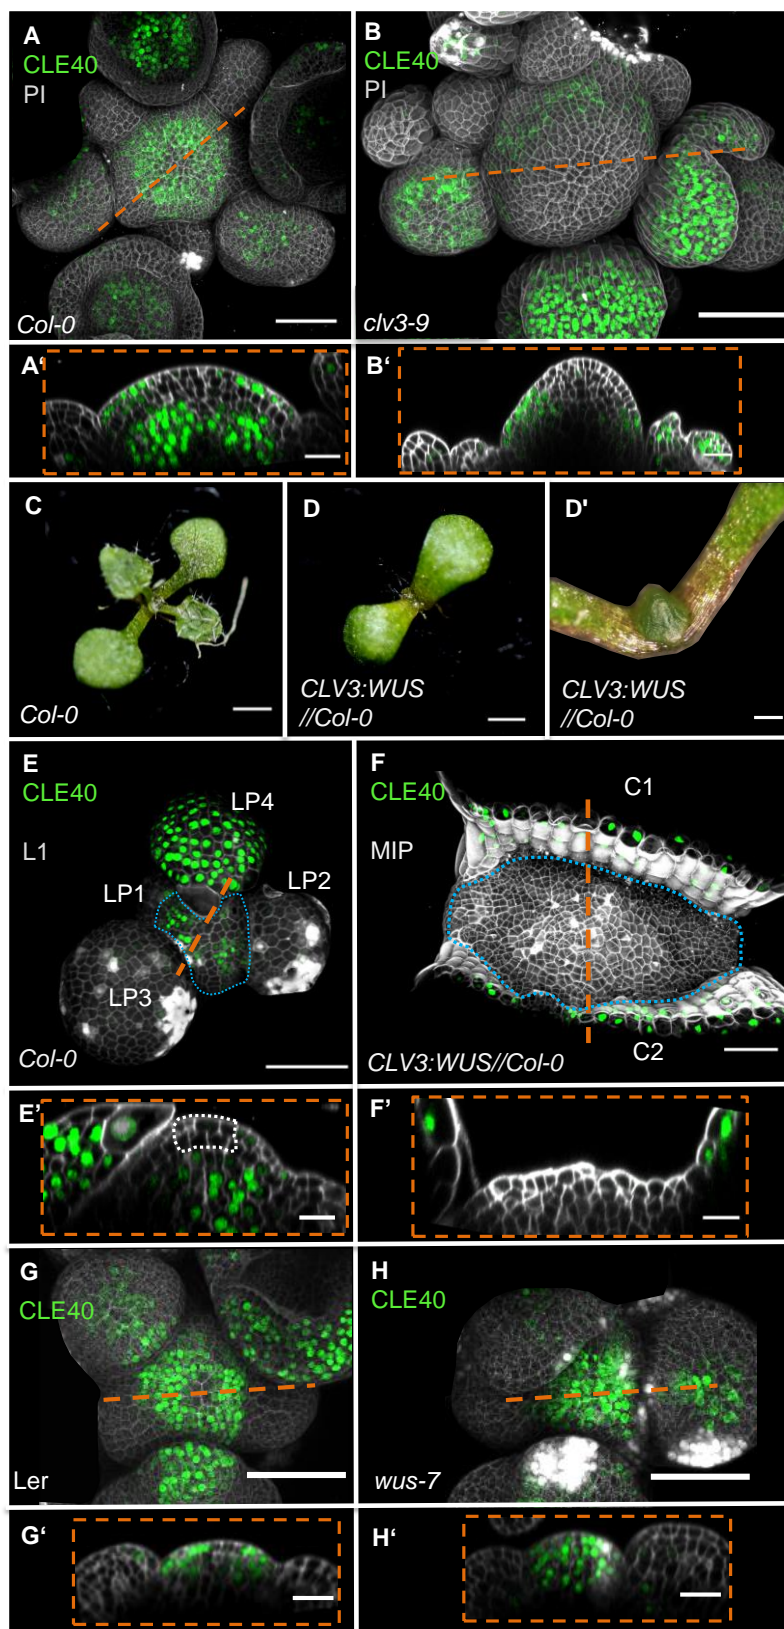

258

259 **Fig. 3: WUS-dependent repression of CLE40 expression in the shoot meristem**

260 **(A)** MIP of CLE40 expression (CLE40:Venus-H2B//Col-0) at 5 WAG, **(A')** Optical section  
 261 through the centre of the IFM (indicated by orange line in (A)) reveals no CLE40 expression in

262 the CZ and in the centre of the meristem. Cells in the L2 layer also show less *CLE40*  
263 expression. High *CLE40* expression is found in the PZ (N=23). **(B)** MIP of *CLE40* expression  
264 in a *clv3-9* mutant (*CLE40:Venus-H2B//clv3-9*) shows expression only in the PZ of the  
265 meristem, in FMs and in sepals (N=6). **(B')** Optical section through the IFM depicts no *CLE40*  
266 expression at the tip and the centre of the meristem. *CLE40* expression is only detected in  
267 cells at the flanks of the IFM and in sepals. **(C)** Arabidopsis seedling at 10 DAG. **(D)** Seedling  
268 expressing *WUS* from the *CLV3* promoter, 10 DAG. **(D')** Magnification of seedling in (D). The  
269 meristem fasciates without forming flowers. **(E)** L1 projection, vegetative seedling with *CLE40*  
270 expression in the PZ and in leaf primordia starting from LP4, at 10 DAG (N=5). **(E')** Optical  
271 section of (E) with *CLE40* expression primordia and rib meristem or periphery. **(F)** MIP of  
272 fasciated meristem as in (D). *CLE40* expression can only be found in the cotyledons (C1 and  
273 C2) next to the meristem (N=5). **(F')** Optical section shows *CLE40* expression only in the  
274 epidermis of cotyledons. **(G and G')** MIP **(G)** and optical section **(G')** of *CLE40* expression  
275 (*CLE40:Venus-H2B//Ler*) in a wild type (*L.er*) background at 5WAG shows no signal in the CZ  
276 or OC. *CLE40* is confined to the PZ and the centre of older flower primordia, and to sepals  
277 (N=8). **(H and H')** MIP of *CLE40* in a *wus-7* background shows expression through the entire  
278 IFM and in the centre of flower primordia. The optical section **(H')** reveals that *CLE40* is also  
279 expressed in the CZ as well as in the OC of the IFM (N= 12).

280 Dashed orange lines indicate the planes of optical sections, dashed blue lines in E and F  
281 enclose the meristem, the dashed white line in E' marks the CZ. Scale bars: 50µm (A, B, G,  
282 H), 20µm (A', B', E, E', F, F', G', H'), 1mm (C, D), 500µm (D'), MIP = Maximum intensity  
283 projection, PI = propidium iodide, L1 = layer 1 projection, C = cotyledon, LP = leaf primordium

284

## 285 **CLE40 signals through BAM1**

286 Given that *CLV1* and *BAM1* perform partially redundant functions to perceive *CLV3* in  
287 shoot and floral meristems, we asked if these receptors also contribute in a *CLE40*  
288 signalling pathway. We therefore generated the translational reporter lines  
289 *CLV1:CLV1-GFP* and *BAM1:BAM1-GFP*, and analysed their expression patterns in



290 detail. We observed dynamic changes of *CLV1* expression during the different stages  
291 of flower primordia initiation. *CLV1:CLV1-GFP* is continuously expressed in deeper  
292 regions of the IFM comprising the OC, and in the meristem periphery where new FMs  
293 are initiating (Fig. 4A). *CLV1* is expressed strongly in cells of the L1 and L2 of incipient  
294 organ primordia (P-1, P0), and only in L2 at P1. P2 and P3 show only very faint  
295 expression in the L1, but in stages from P4 to P6, *CLV1* expression expands from the  
296 L3 into the L2 and L1 (Fig. 4, P1-P6).

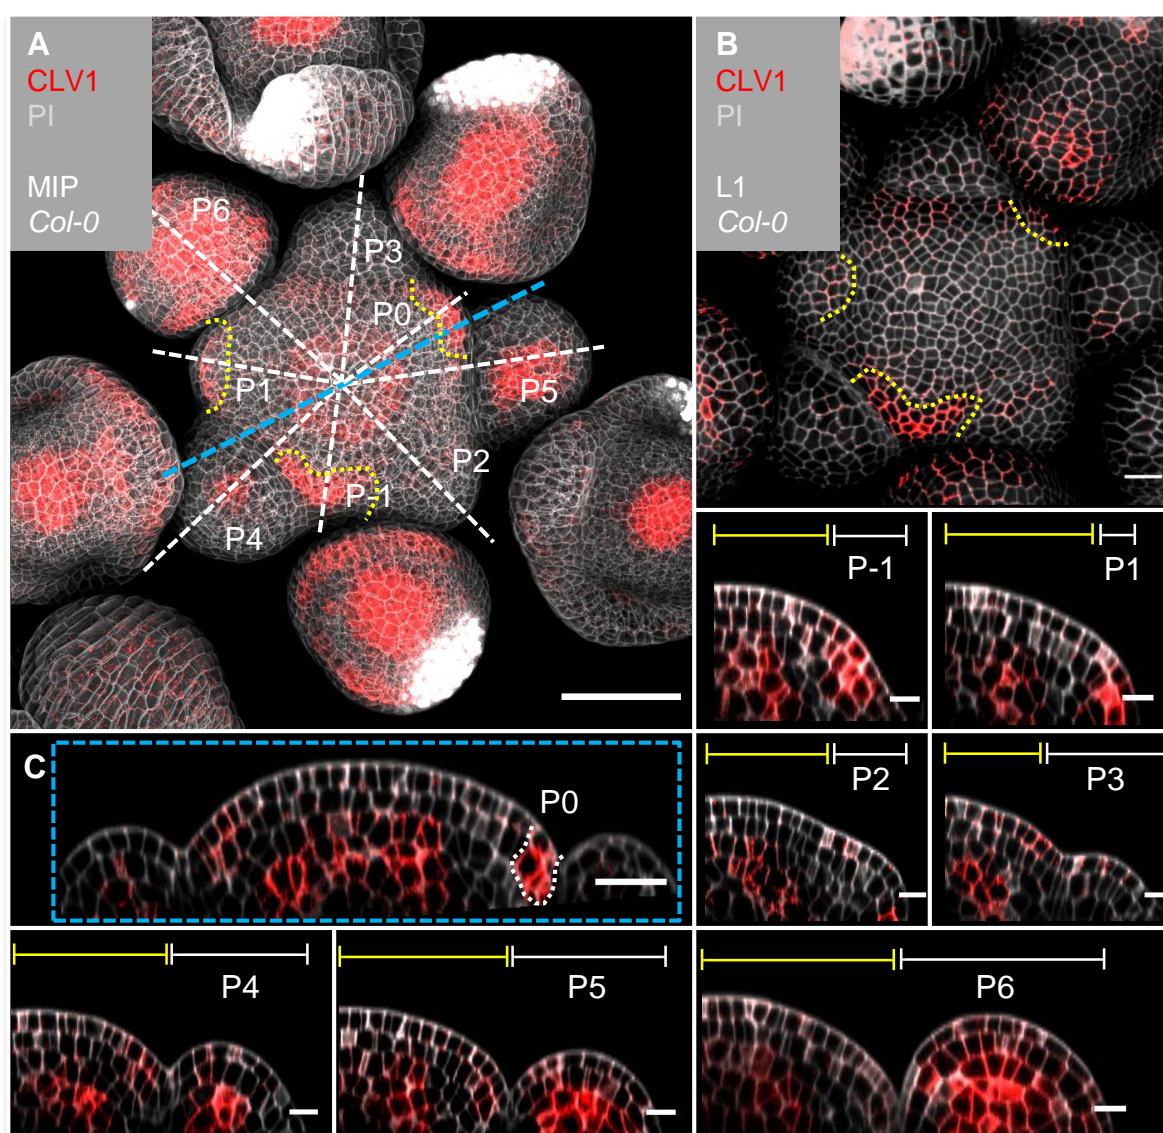

297  
298 **Fig. 4: *CLV1* is expressed in the OC and in cells of incipient organ primordia**  
299 **(A)** MIP of *CLV1* under its endogenous promoter (*CLV1:CLV1-GFP/Col-0*) at 5 WAG shows  
300 *CLV1* expression in the OC of the meristems, IFM and FMs, in incipient organ primordia (P-1



301 to P1) and in sepals (N=15). **(B)** In the L1 projection *CLV1* expression is detected in cells of  
302 incipient organs. **(C)** Optical section through the IFM shows *CLV1* expression in the OC and  
303 in P0. **(P-1-P6)** *CLV1* expression is detected in incipient organ primordia in L1 and L2 (-P1,  
304 P0), in the L2 of P1, and in the OC of the IFM and FMs from P4 to P6.

305 Dashed white and blue lines indicate the planes of optical sections, yellow dashed line in (A)  
306 and (B) mark incipient organ primordia (P-1 to P1), yellow lines (P-1 to P6) indicate the IFM  
307 region, white lines mark the primordium. Scale bars: 50µm (A), 20µm (B, C), 10µm (P1 to P6),  
308 MIP = maximum intensity projection, PI = propidium iodide, L1 = layer 1, P = primordium

309

310 The translational *BAM1:BAM1-GFP* reporter is expressed in the IFM, the FMs and in  
311 floral organs (Fig. 5A). In the IFM, expression is found throughout the L1 layer of the  
312 meristem, and, at an elevated level, in L2 and L3 cells of the PZ, but not in the meristem  
313 centre around the OC, where *CLV1* expression is detected (Fig. 5B,C, compare to Fig.  
314 4C). *BAM1* is less expressed in the deeper regions of primordia from P6 onwards (Fig.  
315 5C). *BAM1* transcription was reported to be upregulated in the meristem centre in the  
316 absence of *CLV3* or *CLV1* signalling (Nimchuk, 2017). Using our translational *BAM1*  
317 reporter in the *clv1-20* mutant background, we confirmed that *BAM1* is expressed in  
318 the meristem centre, similar to the pattern of *CLV1* in the wild type, and that *BAM1* is  
319 upregulated in the L1 of the meristem. Importantly, in a *clv1-20* background *BAM1* is  
320 absent in the peripheral region of the IFM and the L2 (Fig. 5D-F).

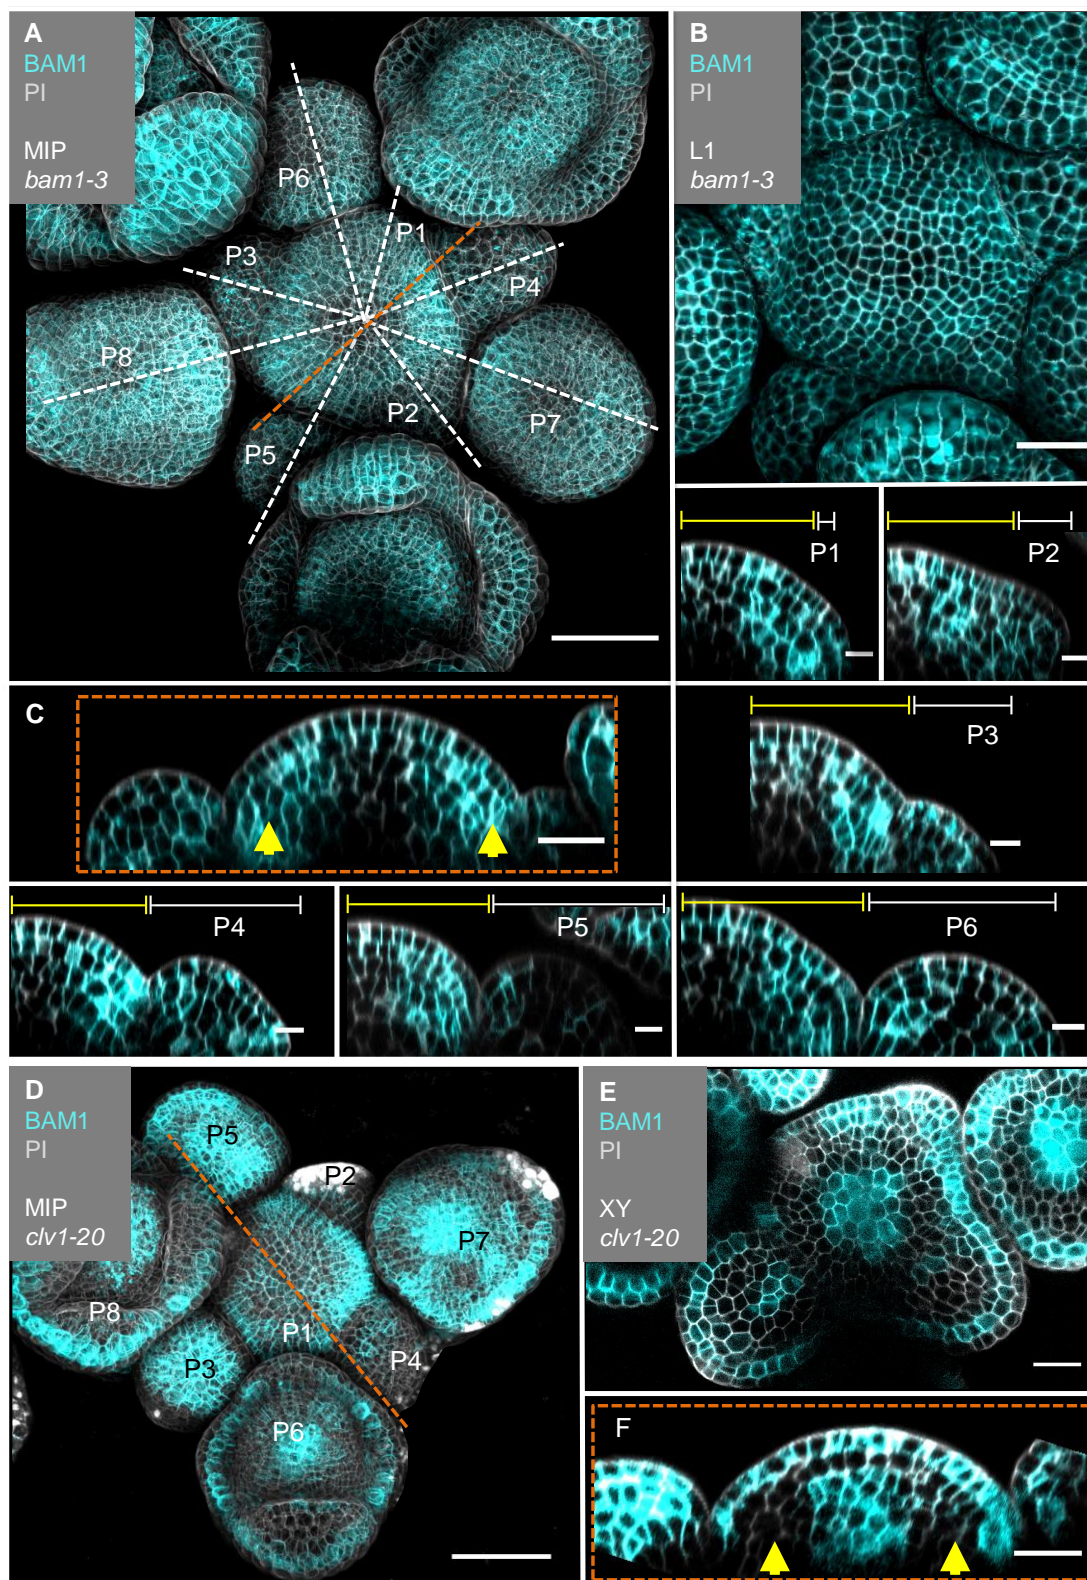

321  
322 **Fig. 5: *BAM1* expression is elevated in the flanks of the IFM and not detectable in the**  
323 **OC**  
324 **(A)** MIP of *BAM1* under its endogenous promoter (*BAM1:BAM1-GFP//bam1-3*) at 5 WAG.  
325 *BAM1* expression is detected nearly throughout the entire inflorescence (IFM, FM, sepals) with

326 weak expression in the CZ of IFM and FMs (N=15). **(B)** The L1 projection of the IFM shows  
327 ubiquitous expression of *BAM1*. **(C)** Optical section through the IFM shows elevated *BAM1*  
328 expression in the flanks (yellow arrows) and a lack of *BAM1* expression in the OC. **(P1 - P6)**  
329 *BAM1* expression is found in all primordia cells. **(D)** MIP of *BAM1* in a *clv1-20* mutant  
330 (*BAM1::BAM1-GFP//bam1-3;clv1-20*). *BAM1* expression is detected in most parts of the  
331 inflorescence, especially in the centre of the IFM and FMs (N=9). **(E)** Cross section (XY)  
332 through of the IFM (from D) shows *BAM1* expression in a *clv1-20* mutant in the CZ (IFM and  
333 FMs) and in the L1/L2. **(F)** Optical section through the meristem (from D) shows *BAM1*  
334 expression in the OC and in the L1, while no *BAM1* expression is detected in the PZ (yellow  
335 arrows).

336 Dashed white and orange lines indicate longitudinal sections; yellow lines (P1 to P6) indicate  
337 the IFM region, white lines (P1 to P6) mark the primordium, yellow arrows indicate high (C) or  
338 no (F) *BAM1* expression in the PZ. Scale bars: 50µm (A, D), 20µm (B, C, E, F), 10µm (P1 to  
339 P6), MIP = maximum intensity projection, PI = propidium iodide, L1 = layer 1, P = primordium  
340

341 In longitudinal and optical cross sections through the IFM, we found that  
342 complementarity of *CLE40* and *CLV3* is reflected in the complementary expression  
343 patterns of *BAM1* and *CLV1* (Fig. 6A-D'). Therefore, we conclude that expression  
344 patterns of *CLV1* and *BAM1* are mostly complementary in the meristem itself and  
345 during primordia development. When comparing *CLE40* and *BAM1* expression  
346 patterns, we found a strong overlap in the peripheral zone of the meristem, during  
347 incipient primordia formation, in older primordia, and in L3 cells surrounding the OC  
348 (Fig. 6A'B', Fig6-SupplFig. 1). Similarly, *CLV3* and *CLV1* are confined to the CZ and  
349 OC, respectively.

350 To analyse if *CLE40*-dependent signalling requires *CLV1* or *BAM1*, we  
351 measured the sizes of IFMs in the respective single and double mutants (Fig. 6E, Fig6-  
352 SupplFig. 2). While *cle40-2* mutant IFMs reached 65% of the wild type size, *clv1-101*

353 plants develop IFMs that were 140% wild type size, whereas *bam1-3;clv1-101* double  
354 mutant meristems reached 450% wild type size, similar to those of *clv3-9* mutants. This  
355 supports the notion that BAM1 can partially compensate for CLV1 function in the CLV3  
356 signalling pathway when expressed in the meristem centre (Fig. 5F) (Nimchuk et al.,  
357 2015). The relationship between CLV1 and BAM1 is not symmetrical, since CLV1 is  
358 expressed in a wildtypic pattern in *bam1-3* mutants (Fig8-SupplFig. 4). Meristem sizes  
359 of *bam1-3* mutants reached 70% of the wild type, and double mutants of *cle40-2;bam1-3*  
360 did not differ significantly. However, double mutants of *cle40-2;clv1-101* developed  
361 like the *clv1-101* single mutant, indicating an epistatic relationship. Importantly, both  
362 *clv1-101* and *bam1-3* mutants lack BAM1 function in the meristem periphery (Fig. 5F),  
363 where also *CLE40* is highly expressed, which could explain the observed epistatic  
364 relationships of *cle40-2* with both *clv1-101* and *bam1-3*. Similar genetic relationships  
365 for *CLV3*, *CLE40*, *CLV1* and *BAM1* were noticed when analysing carpel number as a  
366 proxy for FM sizes. We also noted that generation of larger IFMs and FMs in different  
367 mutants was negatively correlated with leaf size, which we cannot explain so far (Fig1-  
368 SupplFig.1).

369 We hypothesize that *CLE40* signals from the meristem periphery via *BAM1* to promote  
370 meristem growth. Next, we aimed to determine if the commonalities between *cle40-2*  
371 and *bam1-3* mutants extend beyond their effects on meristem size.



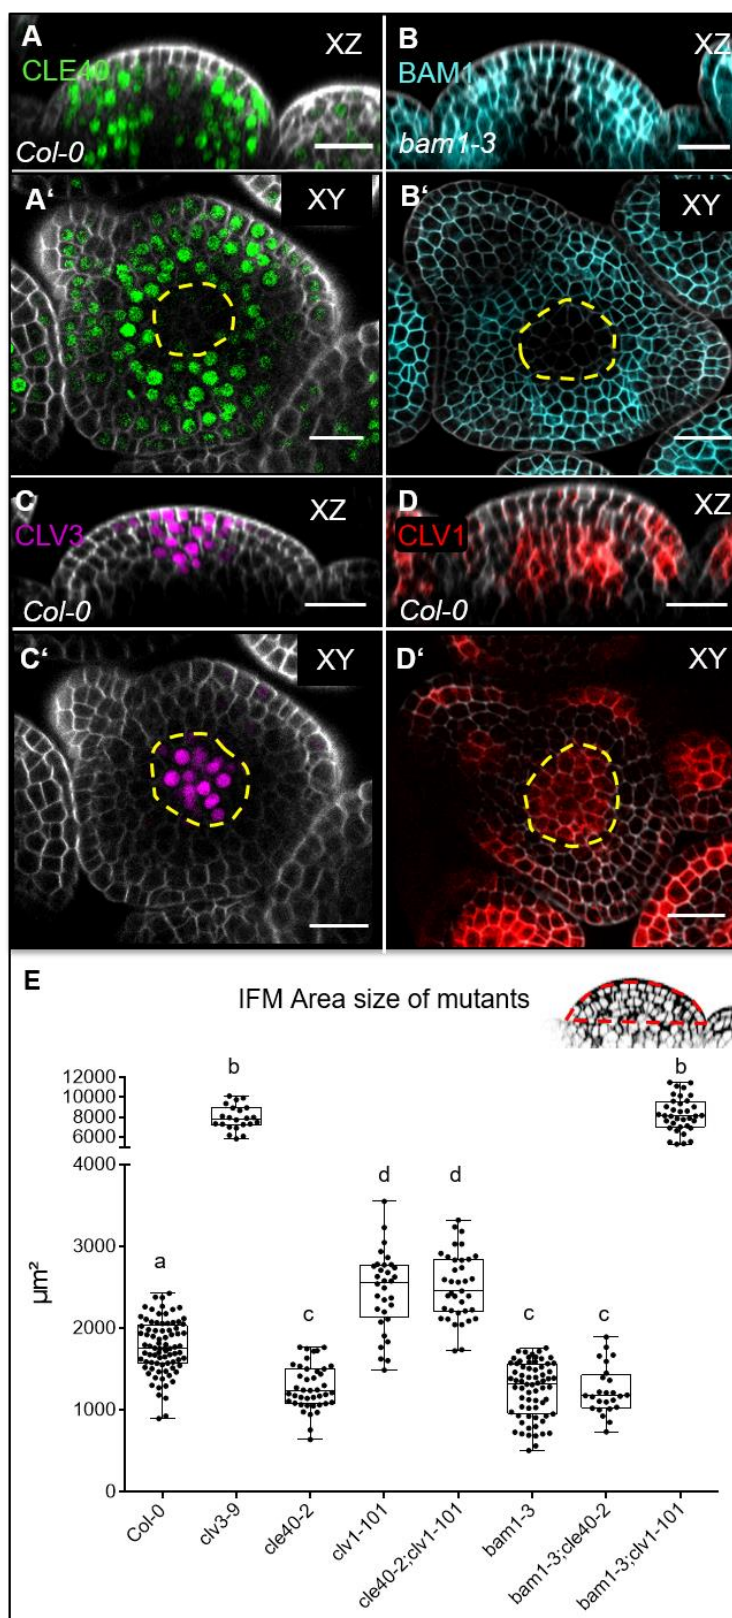

372

373 **Fig. 6: BAM1 and CLV1 are receptors for CLE40 and CLV3, respectively**

374 **(A and A')** Longitudinal and cross sections of *CLE40* (*CLE40:Venus-H2B//Col-0*) through the

375 IFM show *CLE40* expression in the PZ while no *CLE40* expression is detected in the CZ or the

376 OC (dashed yellow line). **(B and B')** In optical sections of *BAM1* (*BAM1:BAM1-GFP//bam1-3*)  
377 through the IFM elevated *BAM1* expression in the PZ and in young primordia can be detected,  
378 while low expression is found in the CZ and no expression is observed in the OC (dashed  
379 yellow line). **(C and C')** Optical and cross section of *CLV3* through the IFM (*CLV3:NLS-*  
380 *3xmCherry//Col-0*) show *CLV3* expression in the CZ (dashed yellow line). **(D and D')** The  
381 native expression of *CLV1* (*CLV1:CLV1-GFP//Col-0*) in an optical and cross section through  
382 the IFM is depicted in the OC (dashed yellow line) and in cells of the L1 and L2 close to  
383 emerging primordia. **(E)** Box and whisker plot of the IFM area size of *Col-0* (N=82), various  
384 single (*clv3-9* (N=22), *cle40-2* (N=42), *clv1-101* (N=32), *bam1-3* (N=68)) and double mutants  
385 (*cle40-2;clv1-101* (N=37), *cle40-2;bam1-3* (N=25) and *bam1-3;clv1-101* (N=36)) at 6 WAG.  
386 Scale bars: 20µm (A – D'), yellow dashed lines indicate the OC (in A', B', D') or the CZ (C'),  
387 Statistical groups were assigned after calculating p-values by ANOVA and Turkey's multiple  
388 comparison test (differential grouping from  $p \leq 0.01$ ). Red line in the inset meristem in (E)  
389 indicates the area that was used for the quantifications in (E).

390

### 391 **A CLE40 and BAM1 signalling pathway promotes *WUS* expression in the** 392 **meristem periphery**

393 We next analysed the number of *WUS*-expressing cells in wild type and mutant  
394 meristems using a *WUS:NLS-GFP* transcriptional reporter. Compared to wild type, the  
395 *WUS* expression domain was laterally strongly expanded in both *clv3-9* and *clv1-101*.  
396 Interestingly, *WUS* signal extended also into the L1 layer of *clv1-101*, albeit in a patchy  
397 pattern (Fig. 7A-C',F). Also noteworthy is that *BAM1* was expressed at a higher level  
398 in the L1 layer of *clv1* mutants. *cle40-2* mutants showed a reduction in the number of  
399 *WUS* expressing cells down to approx. 50% wild-type levels (Fig. 7D-D',F).  
400 Importantly, *WUS* remained expressed in the centre of the meristem, but was there  
401 found in a narrow domain. In *bam1-3* mutants, the *WUS* domain was similarly reduced  
402 as in *cle40-2*, and *WUS* expression focussed in the meristem centre (Fig. 7E,E',F). In

403 contrast, both *clv3-9* and *clv1-101* mutants express *WUS* in a laterally expanded  
404 domain (Fig. 7B',C').

405 To integrate our finding that *CLE40* expression is repressed by *WUS* activity  
406 with the observation that *WUS*, in turn, is promoted by *CLE40* signalling, we  
407 hypothesize that the *CLE40-BAM1-WUS* interaction establishes a new negative  
408 feedback loop. The *CLE40-BAM1-WUS* negative feedback loop acts in the meristem  
409 periphery, while the *CLV3-CLV1-WUS* negative feedback loop acts in the meristem  
410 centre along the apical-basal axis. Both pathways act in parallel during development  
411 to regulate the size of the *WUS* expression domain in the meristem, possibly by  
412 perceiving input signals from two different regions, the CZ and the PZ, of the meristem.

413 We then asked how the two signalling pathways, converge on the regulation of  
414 *WUS* expression, control meristem growth and development. So far, we showed that  
415 both *CLV3-CLV1* and *CLE40-BAM1* signalling control meristem size, but in an  
416 antagonistic manner. However, we noticed that the different mutations in peptides and  
417 receptors affected distinct aspects of meristem shape. We therefore analysed  
418 meristem shape by measuring meristem height (the apical-basal axis) at its centre,  
419 and meristem diameter (the radial axis) at the base in longitudinal sections. The ratio  
420 of height to width then gives a shape parameter " $\sigma$ " (from the greek word σχήμα =  
421 shape). In young inflorescence meristems at 4-5 WAG, when inflorescence stems were  
422 approximately 5-8 cm long, meristems of *cle40-2* and *bam1-3* mutants were slightly  
423 reduced in width, and strongly reduced in height, resulting in reduced  $\sigma$  in comparison  
424 to *Col-0* (Fig. 7G, Fig7-SupplFig. 1A). Meristems of *clv1-101* and *clv3-9* mutants were  
425 similar in width to wild type, but strongly increased in height, giving high  $\sigma$  values (Fig.  
426 7, Fig7-SupplFig. 1A-C). This indicates that *CLV3-CLV1* signalling mostly restricts  
427 meristem growth along the apical-basal axis, while *CLE40-BAM1* signalling promotes  
428 meristem growth along both axes.

429

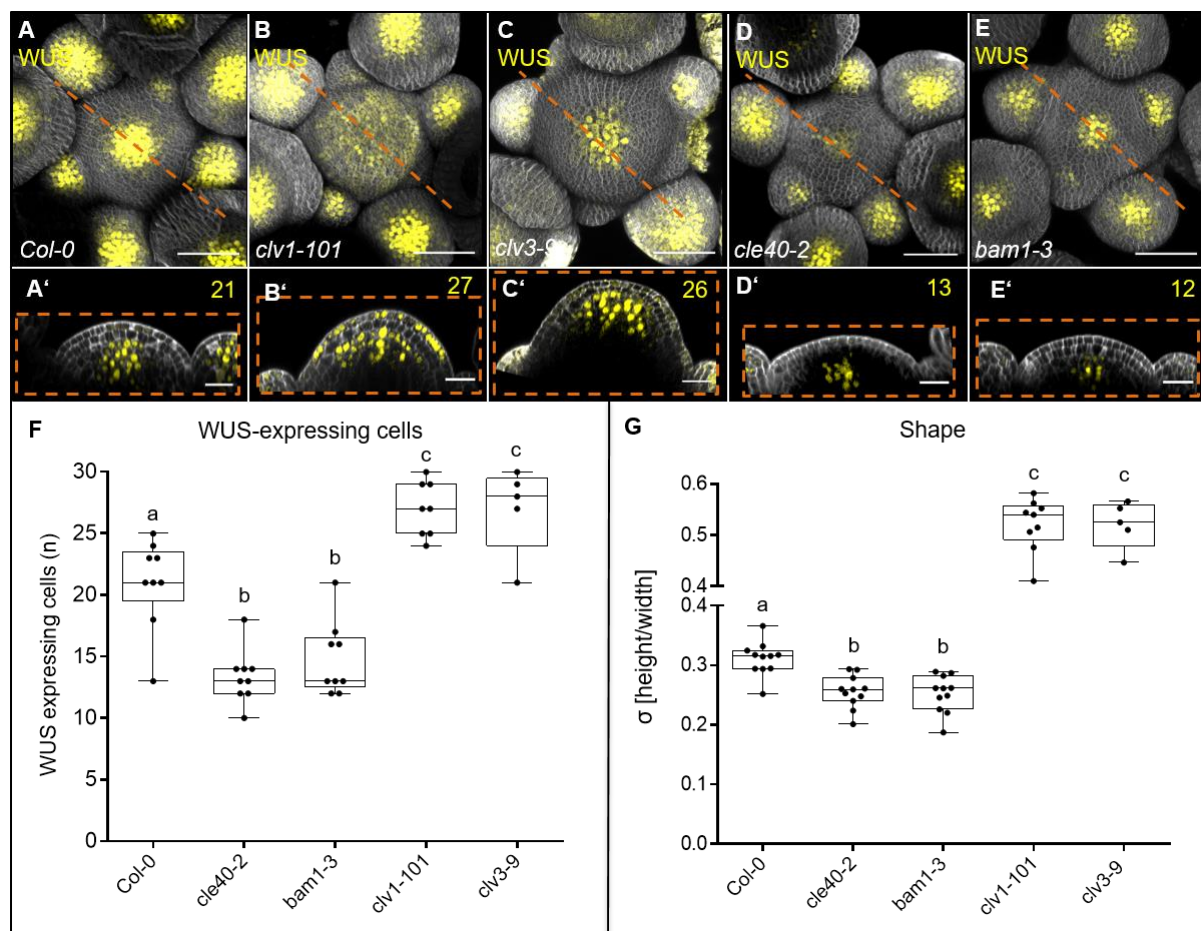

430

431 **Fig. 7: CLE40 and BAM1 promote *WUS* expression**

432 **(A – E')** MIP and optical section of inflorescences at 5WAG expressing the transcriptional  
 433 reporter *WUS:NLS-GFP* in a **(A and A')** *Col-0*, **(B and B')** *clv1-101*, **(C and C')** *clv3-9*, **(D and**  
 434 **D')** *cle40-2* and **(E and E')** *bam1-3* background. In **(A)** wild type plants the *WUS* domain is  
 435 smaller compared to the expanded *WUS* domain in **(B)** *clv1-101* and **(C)** *clv3-9* mutants. The  
 436 *WUS* domain of **(D)** *cle40-2* and **(E)** *bam1-3* mutants is decreased compared to wild type  
 437 plants. Optical sections of **(B')** *clv1-101* and **(C')** *clv3-9* mutants expand along the basal-apical  
 438 axis while the meristem shape of **(D')** *cle40-2* and **(E')** *bam1-3* mutants are flatter compared  
 439 to **(A')** wild type plants,. **(F)** Box and whisker plot shows the number of *WUS*-expressing cells  
 440 in the OC of IFMs of *Col-0* (N=9), *cle40-2* (N=9), *bam1-3* (N=9), *clv1-101* (N=8), and *clv3-9*  
 441 (N=5). **(G)** After 5 WAG *bam1-3* (N=11) and *cle40-2* (N=11) mutants have flatter meristems  
 442 than wild type plants (decreased  $\sigma$  value compared to *Col-0* (N=11)), while *clv1-101* (N=9) and  
 443 *clv3-9* (N=6) mutants increase in their IFM height showing a higher  $\sigma$  value.



444 Scale bars: 50 $\mu$ m (A – E), 20 $\mu$ m (A'-J), Statistical groups and stars were assigned after  
445 calculating p-values by ANOVA and Turkey's multiple comparison test (differential grouping  
446 from  $p \leq 0.01$ ). WAG = weeks after germination, yellow numbers = *WUS* expressing cells in  
447 the CZ,  $\sigma$  value = height/width of IFMs

448

449 Our data expand the current model of shoot meristem homeostasis by taking into  
450 account that stem cells are lost from the OC during organ initiation in the PZ (Fig. 8).  
451 *CLV3* signals from the CZ via *CLV1* in the meristem centre to confine *WUS* expression  
452 to the OC. The diffusion of *WUS* protein along the apical-basal axis towards the  
453 meristem tip establishes the CZ and activates *CLV3* expression as a feedback signal.  
454 During plant growth, rapid cell division activity and organ initiation requires the  
455 replenishment of PZ cells from the CZ, which can be mediated by increased *WUS*  
456 activity. We now propose that the PZ generates *CLE40* as a short range or autocrine  
457 signal that acts through *BAM1* in the meristem periphery. Since *BAM1* and *WUS*  
458 expression do not overlap, we postulate the generation of a diffusible factor that relies  
459 on *CLE40-BAM1*, and acts from the PZ to promote *WUS* expression. *WUS*, in turn,  
460 represses *CLE40* expression from the OC, thus establishing a second negative  
461 feedback regulation. Together, the two intertwined pathways serve to adjust *WUS*  
462 activity in the OC and incorporate information on the actual size of the stem cell  
463 domain, via *CLV3-CLV1*, and the growth requirements from the PZ via *CLE40-BAM1*.  
464

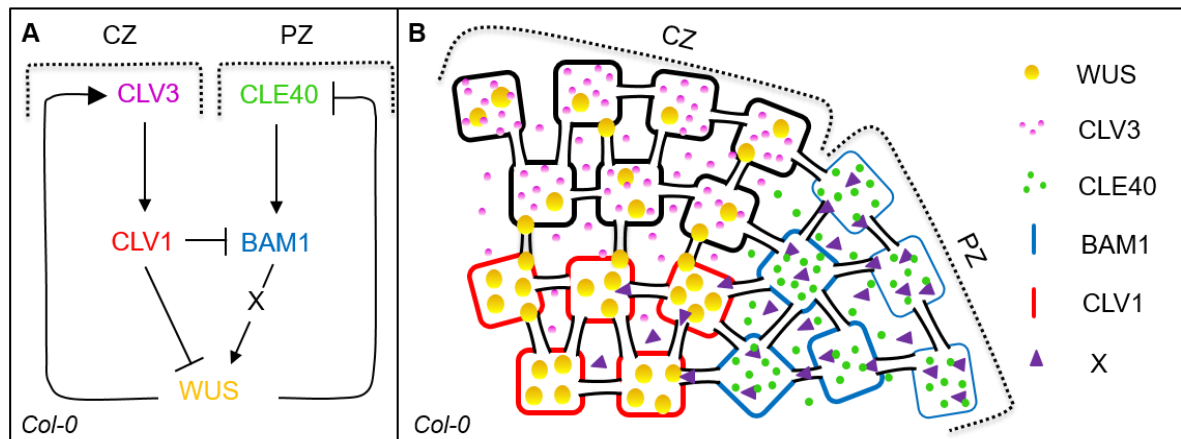

465

466 **Fig. 8: Schematic model of two intertwined signalling pathways in the shoot meristem**

467 **(A and B)** Schematic representation of two negative feedback loops in the IFM of *Arabidopsis*  
468 *thaliana*. CLV3 in the CZ binds to the LRR receptor CLV1 to activate a downstream signalling  
469 cascade which leads to the repression of the transcription factor WUS. In a negative feedback  
470 loop WUS protein moves to the stem cells to activate *CLV3* gene expression. In the PZ of the  
471 IFM a second negative feedback loop controls meristem growth by CLE40 and its receptor  
472 BAM1. CLE40 binds to BAM1 in an autocrine manner, leading to the activation of a  
473 downstream signal “X” which promotes WUS activity. WUS protein in turn represses the  
474 expression of the *CLE40* gene.

475 CZ = central zone, PZ = peripheral zone, arrows indicate a promoting effect and the blocked  
476 line indicates a repressing signal

477

## 478 Discussion

479 Shoot meristems are the centres of growth and organ production throughout the life of  
480 a plant. Meristems fulfil two main tasks, which are the maintenance of a non-  
481 differentiating stem cell pool, and the assignment of stem cell daughters to lateral  
482 organ primordia and differentiation pathways (Hall & Watt, 1989). Shoot meristem  
483 homeostasis requires extensive communication between the CZ, the OC and the PZ.  
484 The discovery of CLV3 as a signalling peptide, which is secreted exclusively from stem  
485 cells in the CZ, and its interaction with WUS in a negative feedback loop was  
486 fundamental for our understanding of such communication pathways (Fletcher, 2020).  
487 Here, we analysed the function of *CLE40* in shoot development of Arabidopsis, and  
488 found that *WUS* expression in the OC is under positive control from the PZ due to the  
489 activity of a CLE40-BAM1 signalling pathway. IFM size is reduced in *cle40* mutants,  
490 indicating that *CLE40* signalling promotes meristem size. Importantly, *CLE40* is  
491 expressed in the PZ, in late stage FMs and in differentiating organs. A common  
492 denominator for the complex and dynamic expression pattern is that *CLE40* expression  
493 is confined to meristematic tissues, but not in organ founder sites or in regions with  
494 high *WUS* activity, such as the OC and the CZ. Both misexpression of *WUS* in the  
495 *CLV3* domain (Fig. 3F), studies of *clv3* mutants with expanded stem cell domains (Fig.  
496 3B, Fig3-SupplFig.1) and analysis of *wus* mutants (Fig. 3, Fig3-SupplFig.2)  
497 underpinned the notion that *CLE40* expression, in contrast to *CLV3*, is negatively  
498 controlled in a *WUS*-dependent manner. Furthermore, we found that the number of  
499 *WUS* expressing cells in *cle40* mutant IFMs is strongly reduced, indicating that *CLE40*  
500 exerts its positive effects on IFM size by expanding the *WUS* expression domain.

501 So far, the antagonistic effects of Arabidopsis *CLV3* and *CLE40* on meristem  
502 size can only be compared to the antagonistic functions of *MpCLE1* and *MpCLE2* on  
503 the gametophytic meristems of *M. polymorpha*, which signal through two distinct

504 receptors, MpTDR and MpCLV1, respectively (Hata & Kyojuka, 2021). By the  
505 complementation of *clv3* mutants through expression of *CLE40* from the *CLV3*  
506 promoter it was shown previously that *CLE40* and *CLV3* are able to activate the same  
507 downstream receptors (Hobe et al., 2003). Our detailed analysis of candidate receptor  
508 expression patterns showed that *CLV3* and *CLV1* are expressed in partially  
509 overlapping domains in the meristem centre, while *CLE40* and *BAM1* are confined to  
510 the meristem periphery. Like *cle40* mutants, *bam1* mutant IFMs are smaller and  
511 maintain a smaller *WUS* expression domain, supporting the notion that *CLE40* and  
512 *BAM1* comprise a signalling unit that increases meristem size by promoting *WUS*  
513 expression. The antagonistic functions of the *CLV3-CLV1* and *CLE40-BAM1* pathways  
514 in the regulation of *WUS* are reflected in their complementary expression patterns.  
515 There is cross-regulation between these two signalling pathways at two levels: (1)  
516 *WUS* has been previously shown to promote *CLV3* levels in the CZ, and we here show  
517 that *WUS* represses (directly or indirectly) *CLE40* expression in the OC and in the CZ  
518 (Fig. 3B, Fig3-SupplFig.1); (2) *CLV1* represses *BAM1* expression in the OC, and  
519 thereby restricts *BAM1* to the meristem periphery (Fig. 5, Fig. 6). In *clv1* mutants,  
520 *BAM1* shifts from the meristem periphery to the OC, and the *WUS* domain laterally  
521 expands in the meristem centre (Fig. 5F, Fig. 7B'). Furthermore, *BAM1* expression  
522 increases also in the L1, which could cause the observed irregular expression of *WUS*  
523 in the outermost cell layer of *clv1* mutants. The role of *BAM1* in the OC is not entirely  
524 clear: despite the high sequence similarity between *CLV1* and *BAM1*, the expression  
525 of *BAM1* in the OC is not sufficient to compensate for the loss of *CLV1* (Fig.5D-F,  
526 Nimchuk et al., 2015). In the OC, *BAM1* appears to restrict *WUS* expression to some  
527 extent, since *clv1;bam1* double mutants reveal a drastically expanded IFM (DeYoung  
528 & Clark, 2008). However, it is possible that *BAM1* in the absence of *CLV1* executes a

529 dual function: to repress *WUS* in response to *CLV3* in the OC as a substitute for *CLV1*,  
530 and simultaneously to promote *WUS* expression in the L1 in response to *CLE40*.

531 The expression domains of *CLE40* and its receptor *BAM1* largely coincide,  
532 suggesting that *CLE40* acts as an autocrine signal. Similarly, protophloem sieve  
533 element differentiation in roots is inhibited by *CLE45*, which acts as an autocrine signal  
534 via *BAM3* (Kang & Hardtke, 2016). Since *WUS* is not expressed in the same cells as  
535 *BAM1*, we have to postulate a non-cell autonomous signal X that is generated in the  
536 peripheral zone due to *CLE40-BAM1* signalling, and diffuses towards the meristem  
537 centre to promote *WUS* expression (Hohm et al., 2010). As a result, *CLE40-BAM1*  
538 signalling from the PZ will provide the necessary feedback signal that stimulates stem  
539 cell activity and thereby serves to replenish cells in the meristem for the initiation of  
540 new organs. The *CLV3-CLV1* signalling pathway then adopts the role of a necessary  
541 feedback signal that avoids an excessive stem cell production.

542 The two intertwined, antagonistically acting signalling pathways that we  
543 described here allow us to better understand the regulation of shoot meristem growth,  
544 development and shape. The previous model, which focussed mainly on the interaction  
545 of the CZ and the OC via the *CLV3-CLV1-WUS* negative feedback regulation, lacked  
546 any direct regulatory contribution from the PZ. *EPFL* peptides were shown to be  
547 expressed in the periphery and to restrict both *CLV3* and *WUS* expression via *ER*  
548 (Zhang et al., 2021). However, *EPFL* peptide expression is not reported to be feedback  
549 regulated from the OC or CZ, and the main function of the *EPFL-ER* pathway is  
550 therefore to restrict overall meristem size (Zhang et al., 2021). The second negative  
551 feedback loop controlled by *CLE40*, which we uncovered here, enables the meristem  
552 to fine-tune stem cell activities in response to fluctuating requirements for new cells  
553 during organ initiation. Due to the combined activities of *CLV3* and *CLE40*, the OC  
554 (with *WUS* as a key player) can now record and compute information from both, the

555 CZ and PZ. Weaker *CLV3* signalling, indicating a reduction in the size of the CZ,  
556 induces preferential growth of the meristem along the apical-basal axis (increasing  $\sigma$ ),  
557 while weaker *CLE40* signals, reporting a smaller PZ, would decrease  $\sigma$  and flatten  
558 meristem shape. It will be intriguing to investigate if different levels of *CLV3* and *CLE40*  
559 also contribute to the shape changes that are observed during early vegetative  
560 development, or upon floral transition in *Arabidopsis*.

561 Many shoot-expressed CLE peptides are encoded in the genomes of maize, rice and  
562 barley, which could act analogously to *CLV3* and *CLE40* of *Arabidopsis*. It is tempting  
563 to speculate that in grasses, a *CLE40*-like, stem cell promoting signalling pathway is  
564 more active than a *CLV3*-like, stem cell restricting pathway. This could contribute to  
565 the typical shape of cereal SAMs, which are, compared to the dome-shaped SAM of  
566 dicotyledonous plants, extended along the apical-basal axis.

## 567 **Material and Methods**

568 All chemicals used for the experiments are listed in Tab. 1.

569

### 570 **Plant material and growth conditions**

571 All wild type *Arabidopsis thaliana* (L.) Heynh. plants used in this study are ecotype  
572 Columbia-0 (*Col-0*), except for *wus-7* mutants which are in Landsberg *erecta* (*L.er.*)  
573 background. Details about *Arabidopsis thaliana* plants carrying mutations in the  
574 following alleles: *bam1-3*, *cle40-2*, *cle40-cr1*, *cle40-cr2*, *cle40-cr3*, *clv1-101*, *clv3-9* and  
575 *wus-7* are described in Tab. 2. All mutants are in *Col-0* background and are assumed  
576 to be null-mutants, except for *wus-7* mutants. *cle40* mutants (*cle40-2*, *cle40-cr1*, *cle40-*  
577 *cr2*, *cle40-cr3*) have either a stop codon, a T-DNA insertion or deletion in or before the  
578 crucial CLE box domain (Fig1-SupplFig.2B'). *clv3-9* mutants were generated in 2003  
579 by the lab of R. Simon. *clv3-9* mutants were created by EMS resulting in a W62STOP  
580 mutation before the critical CLE domain region. *bam1-3* and *clv1-101* mutants have  
581 been described as null mutants before (DeYoung et al., 2006; Kinoshita et al., 2010),  
582 while *clv1-20* is a weak allele which contains a insertion within the 5'-UTR of CLV1 and  
583 results in a reduced mRNA level (Durbak & Tax, 2011). *wus-7* is a weak allele and  
584 mutants were described in previous publications (Graf et al., 2010). Double mutants  
585 were obtained by crossing the single mutant plants until both mutations were proven  
586 to be homozygous for both alleles. Genotyping of the plants was performed either by  
587 PCR or dCAPS method with the primers and restrictions enzymes listed in Tab. 3.  
588 Before sowing, seeds were either sterilized for 10min in an ethanol solution (80% v/v  
589 ethanol, 1,3% w/v sodium hypochloride, 0,02% w/v SDS) or for 1h in a desiccator in a  
590 chloric gas atmosphere (50mL of 13% w/v sodium hypochlorite with 1mL 37% HCL).  
591 Afterwards, seeds were stratified for 48h at 4°C in darkness. Seeds on soil were then  
592 cultivated in phytochambers under long day (LD) conditions (16h light/ 8h dark) at



593 21°C. For selection of seeds or imaging of vegetative meristems seeds were sowed  
594 on ½ Murashige & Skoog (MS) media (1% w/v sucrose, 0.22% w/v MS salts + B5  
595 vitamins, 0.05% w/v MES, 12g/L plant agar, adjusted to pH 5.7 with KOH) in squared  
596 petri dishes. Seeds in petri dishes were kept in phytocabinets under continuous light  
597 conditions at 21°C and 60% humidity.

598

### 599 **Cloning of reporter lines**

600 CLV1 (*CLV1:CLV1-GFP*), BAM1 (*BAM1:BAM1-GFP*) and CLV3  
601 (*CLV3:NLS-3xmCherry*) reporter lines were cloned using the GreenGate method  
602 (Lampropoulos et al., 2013). Entry and destination plasmids are listed in Tab. 4 and  
603 Tab. 5. Promoter and coding sequences were PCR amplified from genomic *Col-0* DNA  
604 which was extracted from rosette leaves of *Col-0* plants. Primers used for amplification  
605 of promoters and coding sequences can be found in Tab. 6 with the specific overhangs  
606 used for the GreenGate cloning system. Coding sequences were amplified without the  
607 stop codon to allow transcription of fluorophores at the C-terminus. Bsal restriction  
608 sites were removed by site-directed mutagenesis using the “QuickChange II Kit”  
609 following the manufacturer’s instructions (Agilent Technologies). Plasmid DNA  
610 amplification was performed by heat-shock transformation into *Escherichia coli* DH5α  
611 cells (10min on ice, 1min at 42°C, 1min on ice, 1h shaking at 37°C), which were  
612 subsequently plated on selective LB medium (1% w/v tryptone, 0.5% w/v yeast extract,  
613 0.5% w/v NaCl) and cultivated overnight at 37°C. All entry and destination plasmids  
614 were validated by restriction digest and Sanger sequencing.

615

### 616 **Generation of stable *A. thaliana* lines**

617 Generation of stable *Arabidopsis thaliana* lines was done by using the floral dip method  
618 (Clough & Bent, 1998).



619 Translational *CLV1* (*CLV1:CLV1-GFP*) and transcriptional *CLV3*  
620 (*CLV3:NLS-3xmCherry*) reporter carry the BASTA plant resistance cassette. T1 seeds  
621 were sown on soil and sprayed with Basta® (120mg/mL) after 5 and 10 DAG. Seeds  
622 of ~10 independent Basta-resistant lines were harvested. The translational *BAM1*  
623 (*BAM1:BAM1-GFP*) reporter line carries a D-Alanin resistance cassette and T1 seeds  
624 were sown on ½ MS media containing 3-4mM D-Alanin. T2 seeds were then selected  
625 on ½ MS media supplied with either 3-4mM D-Alanin or 10µg/mL of DL-  
626 phosphinothricin (PPT) as a BASTA alternative. Only plants from lines showing about  
627 ~75% viability were kept and cultivated under normal plant conditions (21°C, LD). Last,  
628 T3 seeds were plated on ½ MS media supplied with 3-4mM D-Alanin or PPT again  
629 and plant lines showing 100% viability were kept as homozygous lines. The  
630 *CLV3:NLS-3xmCherry* and *CLV1:CLV1-GFP* constructs were transformed into *Col-0*  
631 wild type plants and after a stable T3 line was achieved, plants carrying the  
632 *CLV1:CLV1-GFP* construct were crossed into *bam1-3*, *cle40-2*, *clv3-9* and *clv1-101*  
633 mutants until a homozygous mutant background was reached. *BAM1:BAM1-GFP* lines  
634 were floral dipped into *bam1-3* mutants and subsequently crossed into the *clv1-20*  
635 mutant background which rescued the extremely fasciated meristem phenotype of  
636 *bam1-3;clv1-20* double mutants (Fig. 5D-F). *BAM1:BAM1-GFP//bam1-3* plants were  
637 also crossed into *cle40-2* and *clv3-9* mutants until a homozygous mutant background  
638 was achieved. The *CLE40:Venus-H2B* reporter line was created and described in  
639 Wink, 2013 and the *WUS:NLS-GFP;CLV3:NLS-mCherry* reporter line was a gift from  
640 the Lohmann lab (Wink, 2013). *CLE40:Venus-H2B* reporter line was crossed into  
641 homozygous *clv3-9* and heterozygous *wus-7* mutants. Homozygous *clv3-9* mutants  
642 were detected by its obvious phenotype and were brought into a stable F3 generation.  
643 Homozygous *wus-7* mutants were genotyped. Seeds were kept in the F2 generation,  
644 since homozygous *wus-7* plants do not develop seeds. The *CLE40:Venus-H2B*

645 reporter line was also crossed with the *CLV3:NLS-3xmCherry* reporter line and was  
646 brought into a stable F3 generation. To generate the *CLE40:Venus-H2B//CLV3:WUS*  
647 line, plants carrying the *CLE40:Venus-H2B* line were floral dipped with the *CLV3:WUS*  
648 construct. T1 seeds were sown on 10µg/mL of DL-phosphinothricin (PPT) and the  
649 viable seedlings were imaged. *WUS:NLS-GFP/CLV3:NLS-mCherry//Col-0* reporter  
650 line was crossed into *clv3-9*, *cle40-2*, *clv1-101* and *bam1-3* mutants until a stable  
651 homozygous F3 generation was reached respectively. Detailed information of all used  
652 *A. thaliana* lines can be found in Tab. 7.

653

#### 654 **Confocal imaging of IFMs**

655 To image IFMs *in vivo*, plants were grown under LD (16h light/ 8h dark) conditions and  
656 inflorescences were cut off at 5 or 6 WAG. Inflorescences were stuck on double sided  
657 adhesive tape on an objective slide and dissected until only the meristem and  
658 primordia from P0 to maximum P10 were visible. Next, inflorescences were stained  
659 with either propidium iodide (PI 5mM) or 4',6-Diamidin-2-phenylindol (DAPI 1µg/mL)  
660 for 2 to 5min. Inflorescences were then washed three times with water and  
661 subsequently covered with water and a cover slide and placed under the microscope.  
662 Imaging was performed with a Zeiss LSM780 or LSM880 using a W Plan-Apochromat  
663 40x/1.2 objective. Laser excitation, emission detection range and detector information  
664 for fluorophores and staining can be found in Tab. 8. All IFMs were imaged from the  
665 top taking XY images along the Z axis, resulting in a Z-stack through the inflorescence.  
666 The vegetative meristems were imaged as described for IFMs. Live imaging of the  
667 reporter lines in *A. thaliana* plants was performed by dissecting primary inflorescences  
668 (except for *clv3-9* mutants) at 5 WAG under LD conditions. For imaging of the reporter  
669 lines in the mutant backgrounds of *clv3-9* secondary IFMs were dissected, since the  
670 primary meristems are highly fasciated. Vegetative meristems were cultivated in

671 continuous light conditions at 21°C on ½ MS media plates and were imaged at 10  
672 DAG. For each reporter line at least 3 independent experiments were performed and  
673 at least 5 IFMs were imaged.

674

### 675 **Phenotyping of *CLV* mutants**

676 For meristem measurements (area size, width and height) primary and secondary  
677 IFMs of wild type (*Col-0*) and mutant plants (*cle40-2*, *cle40-cr1-3*, *bam1-3*,  
678 *cle40-2;bam1-3*, *clv1-101*) were dissected at 6 WAG under LD conditions. For *clv3-9*  
679 and *clv1-101;bam1-3* only secondary IFMs were imaged and analyzed, due to the  
680 highly fasciated primary meristems. Optical sections of the Z-stacks were performed  
681 through the middle of the meristem starting in the centre of primordia P5 and ending in  
682 the centre of primordia P4. Based on the optical sections (XZ), meristem height and  
683 area size were measured as indicated in Fig6-SupplFig. 2. IFM sizes from Fig. 1E are  
684 also used in Fig. 6E for *Col-0*, *cle40-2* and *clv3-9* plants.

685 Same procedure was used to count the cells expressing *WUS* in different mutant  
686 backgrounds (Fig. 7A-E). Optical sections of IFMs at 5 WAG were performed from P4  
687 to P5 and only nuclei within the meristem area were counted and plotted. For analyses  
688 of carpel numbers, the oldest 10 - 15 siliques per plant at 5 WAG were used. Each  
689 carpel was counted as one, independent of its size. N number depicts number of  
690 siliques. Leaf measurements were performed at 4 WAG and four leaves of each plant  
691 were measured and plotted. Data was obtained from at least 3 independent  
692 experiments.

693

### 694 **Data analysis**

695 For visualization of images the open-source software ImageJ v 1.53c (Schneider et al.,  
696 2012) was used. All images were adjusted in “Brightness and Contrast”. IFMs in Fig. 7

697 were imaged with identical microscopy settings (except for *c/v3-9* mutants) and were  
698 all changed in “Brightness and Contrast” with the same parameters to ensure  
699 comparability. *c/v3-9* mutants were imaged with a higher laser power since meristems  
700 are highly fasciated. MIPs were created by using the “Z-Projection” function and optical  
701 sections were performed with the “Reslice...” function resulting in the XZ view of the  
702 image. Meristem width, height and area size were measured with the “Straight line” for  
703 width and height and the “Polygon selection” for area size. The shape parameter  $\sigma$   
704 was calculated by the quotient of height and width from each IFM. For L1 visualization  
705 the open-source software MorphoGraphX  
706 (<https://www.mpipz.mpg.de/MorphoGraphX/>) was used that was developed by Richard  
707 Smith. 2½ D images were created by following the steps in the MorphoGraphX manual  
708 (de Reuille et al., 2015). After both channels (PI and fluorophore signal) were projected  
709 to the created mesh, both images were merged using ImageJ v 1.53c.  
710 For all statistical analyses, GraphPad Prism v8.0.0.224 was used. Statistical groups  
711 were assigned after calculating p-values by ANOVA and Turkey’s or Dunett’s multiple  
712 comparison test (differential grouping from  $p \leq 0.01$ ) as indicated under each figure.  
713 Same letters indicate no statistical differences. All plasmid maps and cloning strategies  
714 were created and planned using the software VectorNTI®.  
715

716 Tab. 1: Chemicals and substances used in this study.

| <b>Name</b>                               | <b>Producer</b>           | <b>Product no.</b> | <b>CAS no.</b> |
|-------------------------------------------|---------------------------|--------------------|----------------|
| BASTA® non-selective herbicide            | Bayer CropScience         | 84442615           | N/A            |
| bacto™ agar                               | gibco                     | 214010             | 9105960        |
| bacto™ yeast extract                      | gibco                     | 212750             | 9070604        |
| Carbenicillin disodium salt               | Carl Roth                 | 6344.2             | 4800-94-6      |
| DAPI (4,6-diamidino-2-phenylindole)       | N/A                       | N/A                | 28718-90-3     |
| DL-phosphinothricin (PPT)                 | Duchefa Biochemie bv      | P0159              | 77182-82-2     |
| D-Alanin                                  | Sigma-Aldrich (Merck)     | A7377              | 338-69-2       |
| D(+)-Saccharose                           | Carl Roth                 | 4661.1             | N/A            |
| Gentamicin sulfate                        | Sigma-Aldrich (Merck)     | G1264              | 1405-41-0      |
| Hygromycin B                              | Duchefa Biochemie bv      | H0192              | 31282-04-9     |
| Hypochloride acid (~37%)                  | Thermo Fischer Scientific | H/120/PB15         | 1884567        |
| Kanamycin monosulfate                     | Duchefa Biochemie bv      | K0126.0005         | 25389-94-0     |
| Magnesium chloride x 6H <sub>2</sub> O    | Grüssig GmbH              | 12087              | 205            |
| MES hydrate                               | Sigma-Aldrich (Merck)     | 10240885           | 1266615-59-1   |
| Murashige & Skoog (+ Gamborg B5 vitamins) | Duchefa Biochemie bv      | M0231.0050         | N/A            |
| Phusion High-Fidelity PCR polymerase      | Thermo Fischer Scientific | F530S              | N/A            |
| Plant agar                                | Duchefa Biochemie bv      | P1001.1000         | 9002-18-0      |
| Potassium hydroxide                       | Sigma-Aldrich (Merck)     | 9643807            | N/A            |
| Propidium iodide                          | Thermo Fischer Scientific | P1304MP            | 25535-16-4     |
| Rifampicin                                | TCI                       | R0079              | 13292-46-1     |
| Spectinomycin HCl pentahydrate            | Duchefa Biochemie bv      | S0188              | 22189-32-8     |
| Sodium dodecyl sulfate (SDS)              | Sigma-Aldrich (Merck)     | L3771              | 151-21-3       |

|                           |                                 |        |         |
|---------------------------|---------------------------------|--------|---------|
| Sodium chloride           | Carl Roth                       | 3957.1 | N/A     |
| Sodium hypochloride (13%) | Zentrale Chemikalienlager (ZCL) | 2N370  | N/A     |
| Tetracycline              | Sigma-Aldrich (Merck)           | 87128  | 60-54-8 |
| Tryptone                  | gibco                           | N/A    | 57091   |

717

718

719 Tab. 2: Mutants analysed in this study.

| <b>Allele</b>    | <b>Gene</b> | <b>Mutation</b>        | <b>Reference</b>                    | <b>Background</b> |
|------------------|-------------|------------------------|-------------------------------------|-------------------|
| <i>bam1-3</i>    | AT5G65700   | T-DNA                  | Alonso et al., 2003;<br>SALK_015302 | <i>Col-0</i>      |
| <i>cle40-2</i>   | AT5G12990   | Transposon<br>mutation | Stahl et al., 2009                  | <i>Col-0</i>      |
| <i>cle40-cr1</i> |             |                        |                                     |                   |
| <i>cle40-cr2</i> | AT5G12990   | CRISPR                 | Yamaguchi et al., 2017              | <i>Col-0</i>      |
| <i>cle40-cr3</i> |             |                        |                                     |                   |
| <i>clv3-9</i>    | AT2G27250   | EMS                    | Rüdiger Simon, 2003                 | <i>Col-0</i>      |
| <i>clv1-20</i>   | AT1G75820   | T-DNA                  | SALK_008670                         | <i>Col-0</i>      |
| <i>clv1-101</i>  | AT1G75820   | T-DNA                  | Kinoshita et al., 2010;<br>CS858348 | <i>Col-0</i>      |
| <i>wus-7</i>     | AT2G17950   | EMS                    | Graf et al., 2010                   | <i>L.er.</i>      |

720

721

722 Tab. 3: Primers and methods used for genotyping.

| Allele                                                   | Method | Primer                                                                                                                    | PCR product                                                                           |
|----------------------------------------------------------|--------|---------------------------------------------------------------------------------------------------------------------------|---------------------------------------------------------------------------------------|
| <i>bam1-3</i>                                            | PCR    | bam1-3_F: GGAGCTAATTGCGGATTAACC<br>bam1-3_R: GGA ACTAAACCGGAGAGGTTG<br>Lbb1.3_R: ATTTTGCCGATTTCGGAAC                      | WT amp. : 1208 bp<br>mutant amp. : 998 bp                                             |
| <i>cle40-2</i>                                           | dCAPS  | cle40-2_F:<br>GGAGAAACACAAGATACGAAAGCCATG<br>cle40-2_R:<br>ATTGTGATTTGATACCAACTTAAAA                                      | Restriction enzyme: AseI<br>WT amp. : 460 + 200 bp<br>mutant amp. : 410 + 200 + 60 bp |
| <i>cle40-cr1</i><br><i>cle40-cr2</i><br><i>cle40-cr3</i> | dCAPS  | cle40-cr_F: ATGGCGGCGATGAAATACAA<br>cle40-cr_R: GTTACGCTTTGGCATCTTTCC                                                     | Restriction enzyme: BamHI<br>WT amp.: 750 bp<br>mutant amp. : 491 + 259 bp            |
| <i>clv1-20</i>                                           | PCR    | clv1-20_F:<br>TTTGAATAGTGTGTGACCAAATTTGA<br>clv1-20_R: TCCAATGGTAATTCACCGGTG<br>LBa.1: TGGTTCACGTAGTGGGCCATCG             | WT amp.: 860bp<br>mutant amp: 1200bp                                                  |
| <i>clv1-101</i>                                          | PCR    | clv1-101_F: TTCTCCAAATTCACCAACAGG<br>clv1-101_R: CAACGGAGAAATCCCTAAAGG<br>WiscLox_LT6_R:<br>AATAGCCTTTACTTGAGTTGGCGTAAAAG | WT amp. : 1158 bp<br>mutant amp. : 896 bp                                             |
| <i>wus-7</i>                                             | dCAPS  | wus-7_F: CCGACCAAGAAAGCGGCAACA<br>wus-7_R: AGACGTTCTTGCCCTGAATCTTT                                                        | Restriction enzyme: XmnI<br>WT amplification: 216 bp<br>mutant amp. : 193 + 23 bp     |

723

724

725 Tab. 4: Entry vectors used for cloning.

| <b>Name</b>             | <b>Description</b>                                                                                                             | <b>Bacterial resistance</b> | <b>Backbone</b> | <b>Reference/ Origin</b>  |
|-------------------------|--------------------------------------------------------------------------------------------------------------------------------|-----------------------------|-----------------|---------------------------|
| proBAM1 (pGD288)        | BAM1 promoter<br>3522bp upstream from transcription start                                                                      | Ampicillin                  | pGGA000         | Grégoire Denay            |
| proCLV3                 | CLV3 promoter<br>1480bp upstream from transcription start                                                                      | Ampicillin                  | pGGA000         | Jenia Schlegel            |
| proCLV1                 | CLV1 promoter<br>5759bp upstream from transcription start                                                                      | Ampicillin                  | pGGA000         | Patrick Schultz           |
| omega-element (pGGB002) | Omega- element                                                                                                                 | Ampicillin                  | pGGB000         | Lampropoulos et al., 2013 |
| SV40 NLS (pGGB005)      | SV40 NLS (SIMIAN VIRUS 40 NUCLEAR LOCALIZATION SIGNAL)                                                                         | Ampicillin                  | pGGB000         | Lampropoulos et al., 2013 |
| BAM1_CDS (pGD351)       | BAM1 coding region<br>genomic region of BAM1 START to one codon before STOP, including introns, internal Bsal sites removed    | Ampicillin                  | pGGC000         | Grégoire Denay            |
| CLV1_CDS                | CLV1 coding region<br>2946 bp coding region amplified from genomic Col-0 DNA without STOP codon and internal Bsal site removed | Ampicillin                  | pGGC000         | Jenia Schlegel            |
| 3x-mCherry (pGGC026)    | 3x mCherry                                                                                                                     | Ampicillin                  | pGGC000         | Lampropoulos et al., 2013 |
| linker-GFP (pGD165)     | linker(10aa)-eGFP                                                                                                              | Ampicillin                  | pGGD000         | Grégoire Denay            |
| d-dummy (pGGD002)       | d-dummy                                                                                                                        | Ampicillin                  | pGGD000         | Lampropoulos et al., 2013 |
| tCLV3                   | CLV3 terminator<br>1257 bp downstream of transcription stop                                                                    | Ampicillin                  | pGGE000         | Jenia Schlegel            |
| tUBQ10 (pGGE009)        | UBQ10 terminator                                                                                                               | Ampicillin                  | pGGE000         | Lampropoulos et al., 2013 |
| BastaR (pGGF008)        | pNOS:BastaR (chi sequence removed):tNOS                                                                                        | Ampicillin                  | pGGF000         | Lampropoulos et al., 2013 |
| D-AlaR (pGGF003)        | pMAS:D-AlaR:tMAS                                                                                                               | Ampicillin                  | pGGF000         | Lampropoulos et al., 2013 |

726

727



728 Tab. 5: Destination vectors used to generate transgenic *A. thaliana* reporter lines.

| Name                      | Backbone | Promoter | N-tag                | CDS                  | C-tag               | Terminator       | Resistance         |
|---------------------------|----------|----------|----------------------|----------------------|---------------------|------------------|--------------------|
| <i>BAM1:BAM1-GFP</i>      | pGGZ001  | proBAM1  | Ω- element (pGGB002) | BAM1-CDS             | linker-GFP (pGD165) | tUBQ10 (pGGE009) | D-Alanin (pGGF003) |
| <i>CLV1:CLV1-GFP</i>      | pGGZ001  | proCLV1  | Ω- element (pGGB002) | CLV1-CDS             | linker-GFP (pGD165) | tUBQ10 (pGGE009) | BastaR (pGGF008)   |
| <i>CLV3:NLS-3xmCherry</i> | pGGZ001  | proCLV3  | SV40 NLS             | 3x-mCherry (pGGC026) | d-dummy (pGGD002)   | tCLV3            | BastaR (pGGF008)   |

729

730

731 Tab. 6: Primers used for cloning the entry vectors.

| Name              | Primer                                                                                                                                                                                                                                                                                                  |
|-------------------|---------------------------------------------------------------------------------------------------------------------------------------------------------------------------------------------------------------------------------------------------------------------------------------------------------|
| proBAM1 (pGD288)  | F: AAAGGTCTCAACCTATGATCCGATCCTCAAAAGTATGTA<br>R: AAAGGTCTCATGTTTCTCTCTATCTCTCTTGTGTG                                                                                                                                                                                                                    |
| BAM1_CDS (pGD351) | F: TTTGGTCTCAGGCTCTATGAACTTTTTCTTCTCCTTC<br>R: TTTGGTCTCACTGATAGATTGAGTAGATCCGGC<br>Bsal-site_#1_F: CTTGATCTCTCCGACTCAACCTCTCCGG<br>Bsal-site_#1_R: CCGGAGAGGTTGAGTCCGGAGAGATCAAG<br>Bsal-site_#2_F: CTCATGTTGCTGACTTTGGACTCGCTAAATTCCTTCAAG<br>Bsal-site_#2_R: CTTGAAGGAATTTAGCGAGTCCAAAGTCAGCAACATGAG |
| proCLV1           | F: AAAGGTCTCAACCTGACTATTGTTTATACTTAGTTG<br>R: TTTGGTCTCATGTTTCAATTTTTTAGTGTCTC                                                                                                                                                                                                                          |
| CLV1_CDS          | F: AAAGGTCTCAGGCTTAATGGCGATGAGAC<br>R: TTTGGTCTCACTGAACGCGATCAAGTTC<br>Bsl-site_#1_F: CTAAAGGACACGGACTGCACGACTG<br>Bsl-site_#1_R: CAGTCGTGCAGTCCGTGTCCTTTAG<br>Bsl-site_#2_F: CTTAGAGTATCTTGGACTGAACGGAGCTGG<br>Bsl-site_#2_R: CCAGCTCCGTTTCAGTCCAAGATACTCTAAG                                          |
| proCLV3           | F: AAAGGTCTCAACCTCGGATTATCCATAATAAAAAAC<br>R: AAAGGTCTCATGTTTTTTAGAGAGAAAGTGAAGTCTGAG                                                                                                                                                                                                                   |
| tCLV3             | F: TTTGGTCTCTCTGCCGCCCTAATCTCTTGT<br>R: TTTGGTCTCGTGATATGTGTGTTTTTTCTAAACAATC                                                                                                                                                                                                                           |

732

733

734 Tab. 7: Arabidopsis lines that were analysed in this study.

| <b>Name/Construct</b>                         | <b>Background</b>             | <b>Plant resistance</b> | <b>Generation</b> | <b>Reference</b> |
|-----------------------------------------------|-------------------------------|-------------------------|-------------------|------------------|
| <i>BAM1:BAM1-GFP</i>                          | <i>bam1-3</i>                 | D-Ala                   | T4                | this study       |
| <i>BAM1:BAM1-GFP</i>                          | <i>bam1-3;clv1-20</i>         | D-Ala                   | F3                | this study       |
| <i>BAM1:BAM1-GFP</i>                          | <i>bam1-3;clv3-9</i>          | D-Ala                   | F3                | this study       |
| <i>BAM1:BAM1-GFP</i>                          | <i>bam1-3;cle40-2</i>         | D-Ala                   | F3                | this study       |
| <i>CLE40:Venus-H2B</i>                        | <i>Col-0</i>                  | Hygromycin              | T5                | Rene Wink        |
| <i>CLE40:Venus-H2B</i>                        | <i>clv3-9</i>                 | Hygromycin              | F3                | this study       |
| <i>CLE40:Venus-H2B</i>                        | <i>wus-7</i>                  | Hygromycin              | F2                | this study       |
| <i>CLE40:Venus-H2B</i>                        | <i>CLV3:WUS//Col-0</i>        | Hygromycin/<br>Basta    | T1*               | this study       |
| <i>CLV1:CLV1-GFP</i>                          | <i>Col-0</i>                  | Basta                   | T4                | this study       |
| <i>CLV1:CLV1-GFP</i>                          | <i>bam1-3</i>                 | Basta                   | F3                | this study       |
| <i>CLV1:CLV1-GFP</i>                          | <i>clv3-9</i>                 | Basta                   | F3                | this study       |
| <i>CLV1:CLV1-GFP</i>                          | <i>cle40-2</i>                | Basta                   | F3                | this study       |
| <i>CLV3:NLS-3xmCherry</i>                     | <i>CLE40:Venus-H2B//Col-0</i> | Basta/<br>Hygromycin    | F3                | this study       |
| <i>CLV3:NLS-mCherry</i><br><i>WUS:NLS-GFP</i> | <i>Col-0</i>                  | Kanamycin               | N/A               | Anne Pfeiffer    |
| <i>CLV3:NLS-mCherry</i><br><i>WUS:NLS-GFP</i> | <i>cle40-2</i>                | Kanamycin               | F3                | this study       |
| <i>CLV3:NLS-mCherry</i><br><i>WUS:NLS-GFP</i> | <i>bam1-3</i>                 | Kanamycin               | F3                | this study       |
| <i>CLV3:NLS-mCherry</i><br><i>WUS:NLS-GFP</i> | <i>clv1-101</i>               | Kanamycin               | F3                | this study       |
| <i>CLV3:NLS-mCherry</i><br><i>WUS:NLS-GFP</i> | <i>clv3-9</i>                 | Kanamycin               | F3                | this study       |

735 \* Plants do not overcome seedling stage

736

737 Tab. 8: Microscopy settings used for imaging.

| <b>Fluorophore/<br/>Staining</b> | <b>Excitation</b> | <b>Emission</b> | <b>MBS</b> | <b>Detector</b> | <b>Light source</b> |
|----------------------------------|-------------------|-----------------|------------|-----------------|---------------------|
| DAPI                             | 405 nm            | 410 - 490 nm    | 405        | PMT*            | Diode               |
| GFP                              | 488 nm            | 500 - 545 nm    | 488/561    | GaAsP           | Argon laser         |
| Venus                            | 514 nm            | 518 - 540 nm    | 458/514    | GaAsP           | Argon laser         |
| mCherry                          | 561 nm            | 570 - 640 nm    | 458/561    | PMT*            | DPSS laser**        |
| PI                               | 561 nm            | 595 - 650 nm    | 488/561    | PMT*            | DPSS laser**        |

738 \* Photomultiplier tubes

739 \*\* Diode-pumped solid state

740

741

## 742 **Acknowledgements**

743 This study was funded by DFG through iGrad-Plant (IRTG 2466), CRC 1208 and  
744 CEPLAS (EXC 2048). We thank Cornelia Gieseler, Silke Winters, and Carin Theres  
745 for technical support and Yasuka L. Yamaguchi (Sawa lab), Anne Pfeiffer (Lohmann  
746 lab) and Rene Wink (Simon lab) for sharing Arabidopsis seeds. We also thank Vicky  
747 Howe for proof reading the manuscript, the Center for Advanced imaging (CAi) at HHU  
748 for microscopy support and Aleksandra Sapala for support with MorphoGraphX.

749

## 750 **Author contributions**

751 J.S., G.D., Y.S. and R.S. designed and planned the experiments. J.S. performed  
752 experiments and data analysis, besides counting carpels (Fig1-SupplFig.3), which was  
753 performed by J. Schmidt. G.D., K.G.P. and J.S. generated stable Arabidopsis lines.  
754 Y.S. provided material. G.D., P.B. and J.S. performed the cloning. J.S. and R.S wrote  
755 the manuscript with input from all authors.

756

## 757 **Declaration of Interests**

758 The authors declare no competing interests.

## 759 References

- 760 Berckmans, B., Kirschner, G., Gerlitz, N., Stadler, R., & Simon, R. (2020). CLE40  
761 signaling regulates root stem cell fate. *Plant Physiology*, *182*(4), 1776–1792.  
762 <https://doi.org/10.1104/PP.19.00914>
- 763 Betsuyaku, S., Takahashi, F., Kinoshita, A., Miwa, H., Shinozaki, K., Fukuda, H., &  
764 Sawa, S. (2011). Mitogen-activated protein kinase regulated by the CLAVATA  
765 receptors contributes to shoot apical meristem homeostasis. *Plant and Cell*  
766 *Physiology*, *52*(1), 14–29. <https://doi.org/10.1093/pcp/pcq157>
- 767 Bleckmann, A., Weidtkamp-Peters, S., Seidel, C. a M., & Simon, R. (2010). Stem cell  
768 signaling in Arabidopsis requires CRN to localize CLV2 to the plasma  
769 membrane. *Plant Physiology*, *152*(1), 166–176.  
770 <https://doi.org/10.1104/pp.109.149930>
- 771 Blümke, P., Schlegel, J., Gonzalez-Ferrer, Carmen Becher, S., Gustavo Pinto, K.,  
772 Monaghan, J., & Simon, R. (2021). Receptor-like cytoplasmic kinase MAZZA  
773 mediates developmental processes with CLAVATA1-family receptors in  
774 Arabidopsis. *Journal of Experimental Botany*.
- 775 Bommert, P., Je, B. II, Goldshmidt, A., & Jackson, D. (2013). The maize Gα gene  
776 COMPACT PLANT2 functions in CLAVATA signalling to control shoot meristem  
777 size. *Nature*, *502*(7472), 555–558. <https://doi.org/10.1038/nature12583>
- 778 Brand, U., Fletcher, J. C., Hobe, M., Meyerowitz, E. M., & Simon, R. (2000).  
779 Dependence of stem cell fate in Arabidopsis on a feedback loop regulated by  
780 CLV3 activity. *Science*, *289*(5479), 617–619.  
781 <https://doi.org/10.1126/science.289.5479.617>
- 782 Brand, U., Grünewald, M., Hobe, M., & Simon, R. (2002). Regulation of CLV3  
783 expression by two homeobox genes in Arabidopsis. *Plant Physiology*, *129*(2),  
784 565–575. <https://doi.org/10.1104/pp.001867>
- 785 Clark, S. E., Running, M. P., & Meyerowitz, E. M. (1993). CLAVATA1, a regulator of  
786 meristem and flower development in Arabidopsis. *Development*, *119*, 397–418.
- 787 Clark, S. E., Running, M. P., & Meyerowitz, E. M. (1995). CLAVATA3 is a specific  
788 regulator of shoot and floral meristem development affecting the same  
789 processes as CLAVATA1. *Development*, *121*(7), 2057–2067.
- 790 Clark, S. E., Williams, R. W., & Meyerowitz, E. M. (1997). The CLAVATA1 Gene  
791 Encodes a Putative Receptor Kinase That Controls Shoot and Floral Meristem  
792 Size in Arabidopsis. *Cell*, *89*, 575–585.

- 793 Clough, S. J., & Bent, A. F. (1998). Floral dip: A simplified method for *Agrobacterium*-  
794 mediated transformation of *Arabidopsis thaliana*. *Plant Journal*, *16*(6), 735–743.  
795 <https://doi.org/10.1046/j.1365-3113X.1998.00343.x>
- 796 Crook, A. D., Willoughby, A. C., Hazak, O., Okuda, S., Van Der Molen, K. R., Soyars,  
797 C. L., Cattaneo, P., Clark, N. M., Sozzani, R., Hothorn, M., Hardtke, C. S., &  
798 Nimchuk, Z. L. (2020). BAM1/2 receptor kinase signaling drives CLE peptide-  
799 mediated formative cell divisions in *Arabidopsis* roots. *Proceedings of the*  
800 *National Academy of Sciences of the United States of America*, *117*(51), 32750–  
801 32756. <https://doi.org/10.1073/pnas.2018565117>
- 802 Cui, Y., Hu, C., Zhu, Y., Cheng, K., Li, X., Wei, Z., Xue, L., Lin, F., Shi, H., Yi, J.,  
803 Hou, S., He, K., Li, J., & Gou, X. (2018). Cik receptor kinases determine cell fate  
804 specificatioduring early anther development in *arabidopsis*. *Plant Cell*, *30*(10),  
805 2383–2401. <https://doi.org/10.1105/tpc.17.00586>
- 806 Daum, G., Medzihradzsky, A., Suzaki, T., & Lohmann, J. U. (2014). A mechanistic  
807 framework for noncell autonomous stem cell induction in *Arabidopsis*.  
808 *Proceedings of the National Academy of Sciences of the United States of*  
809 *America*, *111*(40), 14619–14624. <https://doi.org/10.1073/pnas.1406446111>
- 810 de Keijzer, J., Rios, A. F., & Willemsen, V. (2021). Physcomitrium patens: A single  
811 model to study oriented cell divisions in 1d to 3d patterning. *International Journal*  
812 *of Molecular Sciences*, *22*(5), 1–16. <https://doi.org/10.3390/ijms22052626>
- 813 de Reuille, P. B., Routier-Kierzkowska, A. L., Kierzkowski, D., Bassel, G. W.,  
814 Schüpbach, T., Tauriello, G., Bajpai, N., Strauss, S., Weber, A., Kiss, A., Burian,  
815 A., Hofhuis, H., Sapala, A., Lipowczan, M., Heimlicher, M. B., Robinson, S.,  
816 Bayer, E. M., Basler, K., Koumoutsakos, P., ... Smith, R. S. (2015).  
817 MorphoGraphX: A platform for quantifying morphogenesis in 4D. *ELife*, *4*, 1–20.  
818 <https://doi.org/10.7554/eLife.05864>
- 819 Defalco, T. A., Anne, P., James, S. R., Willoughby, A., Johannrees, O., Genolet, Y.,  
820 Pullen, A.-M., Zipfel, C., Hardtke, C. S., & Nimchuk, Z. L. (2021). A conserved  
821 regulatory module regulates receptor kinase signaling in immunity and  
822 development. *BioRxiv*, 2021.01.19.427293.  
823 <https://doi.org/10.1101/2021.01.19.427293>
- 824 DeYoung, B. J., Bickle, K. L., Schrage, K. J., Muskett, P., Patel, K., & Clark, S. E.  
825 (2006). The CLAVATA1-related BAM1, BAM2 and BAM3 receptor kinase-like  
826 proteins are required for meristem function in *Arabidopsis*. *Plant Journal*, *45*(1),

- 827 1–16. <https://doi.org/10.1111/j.1365-313X.2005.02592.x>
- 828 DeYoung, B. J., & Clark, S. E. (2008). BAM receptors regulate stem cell specification  
829 and organ development through complex interactions with CLAVATA signaling.  
830 *Genetics*, 180(2), 895–904. <https://doi.org/10.1534/genetics.108.091108>
- 831 Durbak, A. R., & Tax, F. E. (2011). CLAVATA signaling pathway receptors of  
832 arabidopsis regulate cell proliferation in fruit organ formation as well as in  
833 meristems. *Genetics*, 189(1), 177–194.  
834 <https://doi.org/10.1534/genetics.111.130930>
- 835 Endrizzi, K., Moussian, B., Haecker, A., Levin, J. Z., & Laux, T. (1996). The SHOOT  
836 MERISTEMLESS gene is required for maintenance of undifferentiated cells in  
837 Arabidopsis shoot and floral meristems and acts at a different regulatory level  
838 than the meristem genes WUSCHEL and ZWILLE. *The Plant Journal*, 10, 967–  
839 979.
- 840 Fletcher, J. C. (2020). Recent Advances in Arabidopsis CLE Peptide Signaling.  
841 *Trends in Plant Science*, 25(10), 1005–1016.  
842 <https://doi.org/10.1016/j.tplants.2020.04.014>
- 843 Fletcher, J. C., Brand, U., Running, M. P., Simon, R., & Meyerowitz, E. M. (1999).  
844 Signaling of cell fate decisions by CLAVATA3 in Arabidopsis shoot meristems.  
845 *Science*, 283(5409), 1911–1914. <https://doi.org/10.1126/science.283.5409.1911>
- 846 Goad, D. M., Zhu, C., & Kellogg, E. A. (2017). Comprehensive identification and  
847 clustering of CLV3/ESR-related (CLE) genes in plants finds groups  
848 with potentially shared function. *New Phytologist*, 216(2), 605–616.  
849 <https://doi.org/10.1111/nph.14348>
- 850 Graf, P., Dolzblasz, A., Würschum, T., Lenhard, M., Pfreundt, U., & Laux, T. (2010).  
851 MGOUN1 encodes an Arabidopsis type IB DNA topoisomerase required in stem  
852 cell regulation and to maintain developmentally regulated gene silencing. *Plant*  
853 *Cell*, 22(3), 716–728. <https://doi.org/10.1105/tpc.109.068296>
- 854 Hall, P., & Watt, F. (1989). Stem cells: the generation and maintenance of cellular  
855 diversity. *Development*, 106(4), 619–633.  
856 <http://dev.biologists.org/content/106/4/619.abstract>
- 857 Han, H., Geng, Y., Guo, L., Yan, A., Meyerowitz, E. M., Liu, X., & Zhou, Y. (2020).  
858 The Overlapping and Distinct Roles of HAM Family Genes in Arabidopsis Shoot  
859 Meristems. *Frontiers in Plant Science*, 11(541968).  
860 <https://doi.org/10.3389/fpls.2020.541968>



- 861 Harrison, C. J., Roeder, A. H. K., Meyerowitz, E. M., & Langdale, J. A. (2009). Local  
862 Cues and Asymmetric Cell Divisions Underpin Body Plan Transitions in the  
863 Moss *Physcomitrella patens*. *Current Biology*, *19*(6), 461–471.  
864 <https://doi.org/10.1016/j.cub.2009.02.050>
- 865 Hata, Y., & Kyoizuka, J. (2021). Fundamental mechanisms of the stem cell regulation  
866 in land plants: lesson from shoot apical cells in bryophytes. *Plant Molecular*  
867 *Biology*. <https://doi.org/10.1007/s11103-021-01126-y>
- 868 Hirakawa, Y., Fujimoto, T., Ishida, S., Uchida, N., Sawa, S., Kiyosue, T., Ishizaki, K.,  
869 Nishihama, R., Kohchi, T., & Bowman, J. L. (2020). Induction of Multichotomous  
870 Branching by CLAVATA Peptide in *Marchantia polymorpha*. *Current Biology*,  
871 *30*(19), 3833–3840.e4. <https://doi.org/10.1016/j.cub.2020.07.016>
- 872 Hirakawa, Y., Uchida, N., Yamaguchi, Y. L., Tabata, R., Ishida, S., Ishizaki, K.,  
873 Nishihama, R., Kohchi, T., Sawa, S., & Bowman, J. L. (2019). Control of  
874 proliferation in the haploid meristem by CLE peptide signaling in *marchantia*  
875 *polymorpha*. *PLoS Genetics*, *15*(3), 1–20.  
876 <https://doi.org/10.1371/journal.pgen.1007997>
- 877 Hobe, M., Müller, R., Grünewald, M., Brand, U., & Simon, R. (2003). Loss of CLE40,  
878 a protein functionally equivalent to the stem cell restricting signal CLV3,  
879 enhances root waving in *Arabidopsis*. *Development Genes and Evolution*,  
880 *213*(8), 371–381. <https://doi.org/10.1007/s00427-003-0329-5>
- 881 Hohm, T., Zitzler, E., & Simon, R. (2010). A dynamic model for stem cell homeostasis  
882 and patterning in *Arabidopsis* meristems. *PLoS ONE*, *5*(2), 1–9.  
883 <https://doi.org/10.1371/journal.pone.0009189>
- 884 Hord, C. L. H., Chen, C., DeYoung, B. J., Clark, S. E., & Ma, H. (2006). The  
885 BAM1/BAM2 receptor-like kinases are important regulators of *Arabidopsis* early  
886 anther development. *Plant Cell*, *18*(7), 1667–1680.  
887 <https://doi.org/10.1105/tpc.105.036871>
- 888 Ishida, T., Tabata, R., Yamada, M., Aida, M., Mitsumasu, K., Fujiwara, M.,  
889 Yamaguchi, K., Shigenobu, S., Higuchi, M., Tsuji, H., Shimamoto, K., Hasebe,  
890 M., Fukuda, H., & Sawa, S. (2014). Heterotrimeric G proteins control stem cell  
891 proliferation through CLAVATA signaling in *Arabidopsis*. *EMBO Reports*, *15*(11),  
892 1202–1209. <https://doi.org/10.15252/embr.201678010>
- 893 Je, B. II, Gruel, J., Lee, Y. K., Bommert, P., Arevalo, E. D., Eveland, A. L., Wu, Q.,  
894 Goldshmidt, A., Meeley, R., Bartlett, M., Komatsu, M., Sakai, H., Jönsson, H., &



- 895 Jackson, D. (2016). Signaling from maize organ primordia via FASCIATED  
896 EAR3 regulates stem cell proliferation and yield traits. *Nature Genetics*, *48*(7),  
897 785–791. <https://doi.org/10.1038/ng.3567>
- 898 Jeong, S., Trotochaud, A. E., & Clark, S. E. (1999). The Arabidopsis CLAVATA2  
899 gene encodes a receptor-like protein required for the stability of the CLAVATA1  
900 receptor-like kinase. *Plant Cell*, *11*(10), 1925–1933.  
901 <https://doi.org/10.1105/tpc.11.10.1925>
- 902 Kang, Y. H., & Hardtke, C. S. (2016). Arabidopsis MAKR 5 is a positive effector of  
903 BAM3-dependent CLE45 signaling. *EMBO Reports*, *17*(8), 1145–1154.  
904 <https://doi.org/10.15252/embr.201642450>
- 905 Kinoshita, A., Betsuyaku, S., Osakabe, Y., Mizuno, S., Nagawa, S., Stahl, Y., Simon,  
906 R., Yamaguchi-Shinozaki, K., Fukuda, H., & Sawa, S. (2010). RPK2 is an  
907 essential receptor-like kinase that transmits the CLV3 signal in Arabidopsis.  
908 *Development*, *137*(24), 4327–4327. <https://doi.org/10.1242/dev.061747>
- 909 Lampropoulos, A., Sutikovic, Z., Wenzl, C., Maegele, I., Lohmann, J. U., & Forner, J.  
910 (2013). GreenGate - A novel, versatile, and efficient cloning system for plant  
911 transgenesis. *PLoS ONE*, *8*(12). <https://doi.org/10.1371/journal.pone.0083043>
- 912 Laux, T., Mayer, K. F. X., Berger, J., & Jürgens, G. (1996). The WUSCHEL gene is  
913 required for shoot and floral meristem integrity in Arabidopsis. *Development*,  
914 *122*, 87–96.
- 915 Lee, H., Jun, Y. S., Cha, O. K., & Sheen, J. (2019). Mitogen-activated protein kinases  
916 MPK3 and MPK6 are required for stem cell maintenance in the Arabidopsis  
917 shoot apical meristem. *Plant Cell Reports*, *38*(3), 311–319.  
918 <https://doi.org/10.1007/s00299-018-2367-5>
- 919 Liu, L., Gallagher, J., Arevalo, E. D., Chen, R., Skopelitis, T., Wu, Q., Bartlett, M., &  
920 Jackson, D. (2021). Enhancing grain-yield-related traits by CRISPR–Cas9  
921 promoter editing of maize CLE genes. *Nature Plants*, *7*(3), 287–294.  
922 <https://doi.org/10.1038/s41477-021-00858-5>
- 923 Ma, Y., Miotk, A., Šutiković, Z., Ermakova, O., Wenzl, C., Medzihradzsky, A.,  
924 Gaillochet, C., Forner, J., Utan, G., Brackmann, K., Galván-Ampudia, C. S.,  
925 Vernoux, T., Greb, T., & Lohmann, J. U. (2019). WUSCHEL acts as an auxin  
926 response rheostat to maintain apical stem cells in Arabidopsis. *Nature*  
927 *Communications*, *10*(5093), 1–11. <https://doi.org/10.1038/s41467-019-13074-9>
- 928 Mandel, T., Moreau, F., Kutsher, Y., Fletcher, J. C., Carles, C. C., & Williams, L. E.

- 929 (2014). The ERECTA receptor kinase regulates Arabidopsis shoot apical  
930 meristem size, phyllotaxy and floral meristem identity. *Development*, *141*(4),  
931 830–841. <https://doi.org/10.1242/dev.104687>
- 932 Mayer, K. F. X., Schoof, H., Haecker, A., Lenhard, M., Jürgens, G., & Laux, T.  
933 (1998). Role of WUSCHEL in Regulating Stem Cell Fate in the Arabidopsis  
934 Shoot Meristem. *Cell Press*, *95*, 805–815.
- 935 Müller, R., Bleckmann, A., & Simon, R. (2008). The receptor kinase CORYNE of  
936 Arabidopsis transmits the stem cell-limiting signal CLAVATA3 independently of  
937 CLAVATA1. *Plant Cell*, *20*(4), 934–946. <https://doi.org/10.1105/tpc.107.057547>
- 938 Müller, R., Borghi, L., Kwiatkowska, D., Laufs, P., & Simon, R. (2006). Dynamic and  
939 Compensatory Responses of Arabidopsis Shoot and Floral Meristems to CLV3  
940 Signaling. *The Plant Cell*, *18*(5), 1188–1198.  
941 <https://doi.org/10.1105/tpc.105.040444>
- 942 Nimchuk, Z. L. (2017). CLAVATA1 controls distinct signaling outputs that buffer shoot  
943 stem cell proliferation through a two-step transcriptional compensation loop.  
944 *PLoS Genetics*, *13*(3), 1–19. <https://doi.org/10.1371/journal.pgen.1006681>
- 945 Nimchuk, Z. L., Zhou, Y., Tarr, P. T., Peterson, B. a, & Meyerowitz, E. M. (2015).  
946 Plant stem cell maintenance by transcriptional cross-regulation of related  
947 receptor kinases. *Development*, *142*(6), 1043–1049.  
948 <https://doi.org/10.1242/dev.119677>
- 949 Ogawa, M., Shinohara, H., Sakagami, Y., & Matsubayash, Y. (2008). Arabidopsis  
950 CLV3 peptide directly binds CLV1 ectodomain. *Science*, *319*(5861), 294.  
951 <https://doi.org/10.1126/science.1150083>
- 952 Ohmori, Y., Tanaka, W., Kojima, M., Sakakibara, H., & Hirano, H. Y. (2013).  
953 WUSCHEL-RELATED HOMEODOMAIN4 Is involved in meristem maintenance and  
954 is negatively regulated by the CLE gene FCP1 in rice. *The Plant Cell*, *25*(1),  
955 229–241. <https://doi.org/10.1105/tpc.112.103432>
- 956 Pallakies, H., & Simon, R. (2014). The CLE40 and CRN/CLV2 signaling pathways  
957 antagonistically control root meristem growth in arabidopsis. *Molecular Plant*,  
958 *7*(11), 1619–1636. <https://doi.org/10.1093/mp/ssu094>
- 959 Reddy, V. G., Heisler, M. G., Ehrhardt, D. W., & Meyerowitz, E. M. (2004). Real-time  
960 lineage analysis reveals oriented cell divisions associated with morphogenesis at  
961 the shoot apex of Arabidopsis thaliana. *Development*, *131*(17), 4225–4237.  
962 <https://doi.org/10.1242/dev.01261>

- 963 Rodriguez-Leal, D., Xu, C., Kwon, C. T., Soyars, C., Demesa-Arevalo, E., Man, J.,  
964 Liu, L., Lemmon, Z. H., Jones, D. S., Van Eck, J., Jackson, D. P., Bartlett, M. E.,  
965 Nimchuk, Z. L., & Lippman, Z. B. (2019). Evolution of buffering in a genetic  
966 circuit controlling plant stem cell proliferation. *Nature Genetics*, *51*(5), 786–792.  
967 <https://doi.org/10.1038/s41588-019-0389-8>
- 968 Schnablová, R., Neustupa, J., Woodard, K., Klimešová, J., & Herben, T. (2020).  
969 Disentangling phylogenetic and functional components of shape variation among  
970 shoot apical meristems of a wide range of herbaceous angiosperms. *American*  
971 *Journal of Botany*, *107*(1), 20–30. <https://doi.org/10.1002/ajb2.1407>
- 972 Schneider, C. A., Rasband, W. S., & Eliceiri, K. W. (2012). NIH Image to ImageJ: 25  
973 years of image analysis. *Nature Methods*, *9*(7), 671–675.  
974 <https://doi.org/10.1038/nmeth.2089>
- 975 Schoof, H., Lenhard, M., Haecker, A., Mayer, K. F. X., Jürgens, G., & Laux, T.  
976 (2000). The Stem Cell Population of Arabidopsis Shoot Meristems Is Maintained  
977 by a Regulatory Loop between the CLAVATA and WUSCHEL Genes. *Cell*, *100*,  
978 635–644.
- 979 Shinohara, H., & Matsubayashi, Y. (2015). Reevaluation of the CLV3-receptor  
980 interaction in the shoot apical meristem: Dissection of the CLV3 signaling  
981 pathway from a direct ligand-binding point of view. *Plant Journal*, *82*(2), 328–  
982 336. <https://doi.org/10.1111/tpj.12817>
- 983 Shpak, E. D. (2013). Diverse roles of ERECTA family genes in plant development.  
984 *Journal of Integrative Plant Biology*, *55*(12), 1238–1250.  
985 <https://doi.org/10.1111/jipb.12108>
- 986 Shpak, E. D., Berthiaume, C. T., Hill, E. J., & Torii, K. U. (2004). Synergistic  
987 interaction of three ERECTA-family receptor-like kinases controls Arabidopsis  
988 organ growth and flower development by promoting cell proliferation.  
989 *Development*, *131*(7), 1491–1501. <https://doi.org/10.1242/dev.01028>
- 990 Somssich, M., Je, B. II, Simon, R., & Jackson, D. (2016). CLAVATA-WUSCHEL  
991 signaling in the shoot meristem. *Development*, *143*(18), 3238–3248.  
992 <https://doi.org/10.1242/dev.133645>
- 993 Stahl, Y., Grabowski, S., Bleckmann, A., Kühnemuth, R., Weidtkamp-Peters, S.,  
994 Pinto, K. G., Kirschner, G. K., Schmid, J. B., Wink, R. H., Hülsewede, A.,  
995 Felekyan, S., Seidel, C. A. M., & Simon, R. (2013). Moderation of arabidopsis  
996 root stemness by CLAVATA1 and ARABIDOPSIS CRINKLY4 receptor kinase

- 997 complexes. *Current Biology*, 23(5), 362–371.
- 998 <https://doi.org/10.1016/j.cub.2013.01.045>
- 999 Stahl, Y., & Simon, R. (2005). Plant stem cell niches. *International Journal of*  
1000 *Developmental Biology*, 49, 479–489. <https://doi.org/10.1387/ijdb.041929ys>
- 1001 Stahl, Y., & Simon, R. (2010). Plant primary meristems: shared functions and  
1002 regulatory mechanisms. *Current Opinion in Plant Biology*, 13, 53–58.  
1003 <https://doi.org/10.1016/j.pbi.2009.09.008>
- 1004 Stahl, Y., Wink, R. H., Ingram, G. C., & Simon, R. (2009). A Signaling Module  
1005 Controlling the Stem Cell Niche in Arabidopsis Root Meristems. *Current Biology*,  
1006 19(11), 909–914. <https://doi.org/10.1016/j.cub.2009.03.060>
- 1007 Steeves, T. A., & Sussex, I. M. (1989). Patterns in Plant Development. *Cambridge*  
1008 *University Press, 2nd edn.*
- 1009 Suzuki, T., Yoshida, A., & Hirano, H. Y. (2008). Functional diversification of  
1010 CLAVATA3-related CLE proteins in meristem maintenance in rice. *Plant Cell*,  
1011 20(8), 2049–2058. <https://doi.org/10.1105/tpc.107.057257>
- 1012 Takahashi, G., Betsuyaku, S., Okuzumi, N., Kiyosue, T., & Hirakawa, Y. (2021). An  
1013 Evolutionarily Conserved Coreceptor Gene Is Essential for CLAVATA Signaling  
1014 in *Marchantia polymorpha*. *Frontiers in Plant Science*, 12(657548).  
1015 <https://doi.org/10.3389/fpls.2021.657548>
- 1016 Torii, K. U., Mitsukawa, N., Oosumi, T., Matsuura, Y., Yokoyama, R., Whittier, R. F.,  
1017 & Komeda, Y. (1996). The Arabidopsis ERECTA Gene Encodes a Putative  
1018 Receptor Protein Kinase with Extracellular Leucine-Rich Repeats. *The Plant*  
1019 *Cell*, 8(4), 735–746. <https://doi.org/10.1105/tpc.8.4.735>
- 1020 Whitewoods, C. D., Cammarata, J., Nemeček, Z., Sang, S., Crook, A. D.,  
1021 Aoyama, T., Wang, X. Y., Waller, M., Kamisugi, Y., Cuming, A. C., Szövényi, P.,  
1022 Nimchuk, Z. L., Roeder, A. H. K., Scanlon, M. J., & Harrison, C. J. (2018).  
1023 CLAVATA Was a Genetic Novelty for the Morphological Innovation of 3D Growth  
1024 in Land Plants. *Current Biology*, 28(15), 2365–2376.  
1025 <https://doi.org/10.1016/j.cub.2018.05.068>
- 1026 Wink, R. (2013). *On the function of peptide signaling pathways in the root meristem*  
1027 *of Arabidopsis thaliana.*
- 1028 Yadav, R. K., Perales, M., Gruel, J., Girke, T., Jönsson, H., & Reddy, V. G. (2011).  
1029 WUSCHEL protein movement mediates stem cell homeostasis in the  
1030 Arabidopsis shoot apex. *Genes and Development*, 25(19), 2025–2030.

- 1031 <https://doi.org/10.1101/gad.17258511>
- 1032 Yamaguchi, Y. L., Ishida, T., Yoshimura, M., Imamura, Y., Shimaoka, C., & Sawa, S.  
1033 (2017). A Collection of Mutants for CLE-Peptide-Encoding Genes in Arabidopsis  
1034 Generated by CRISPR/Cas9-Mediated Gene Targeting. *Plant and Cell*  
1035 *Physiology*, 58(11), 1848–1856. <https://doi.org/10.1093/pcp/pcx139>
- 1036 Zhang, L., DeGennaro, D., Lin, G., Chai, J., & Shpak, E. D. (2021). ERECTA family  
1037 signaling constrains CLAVATA3 and WUSCHEL to the center of the shoot apical  
1038 meristem. *Development*, 148(5), 1–10. <https://doi.org/10.1242/dev.189753>
- 1039 Zhou, Y., Yan, A., Han, H., Li, T., Geng, Y., Liu, X., & Meyerowitz, E. M. (2018). Hairy  
1040 meristem with wuschel confines clavata3 expression to the outer apical  
1041 meristem layers. *Science*, 361(6401), 502–506.  
1042 <https://doi.org/10.1126/science.aar8638>
- 1043

1044 **Supplementary Figures**

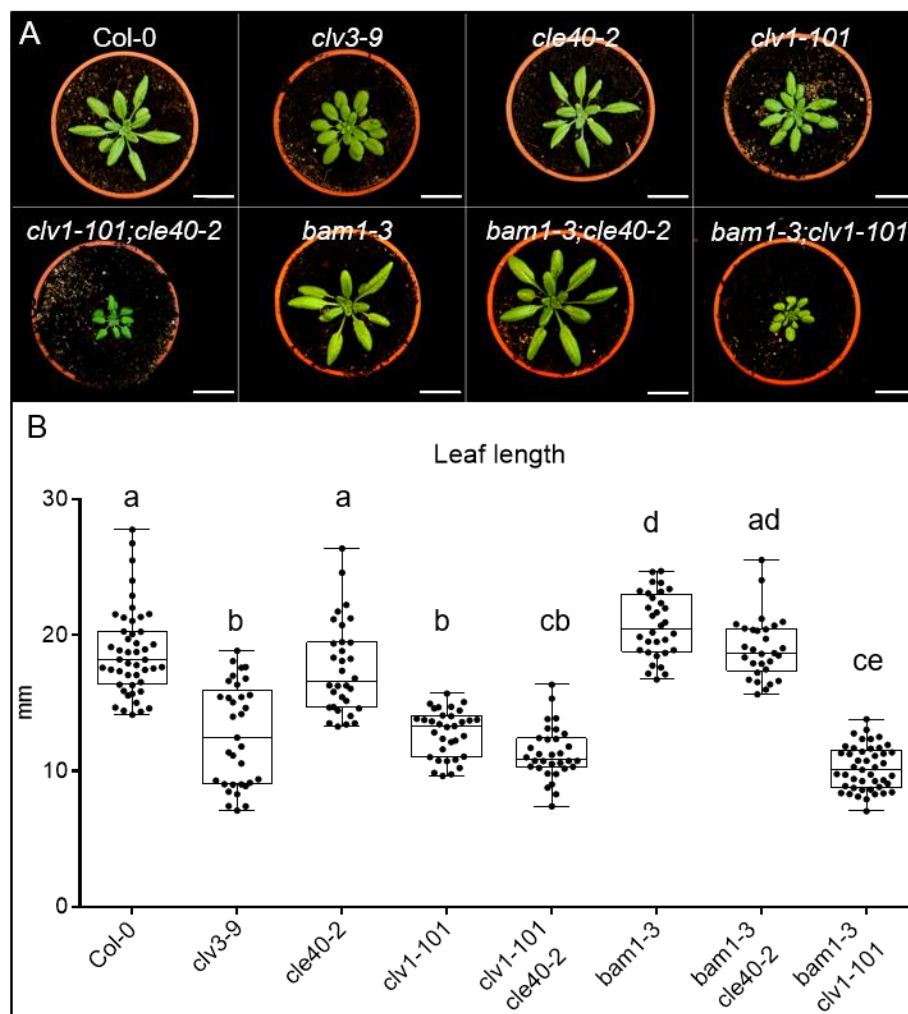

1045

1046 **Fig1-SupplFig.1: Mutants from the CLV pathway show differences in their leaf lengths**

1047 **(A)** Wild type (*Col-0*) and different single and double mutants (*clv3-9*, *cle40-2*, *clv1-101*, *clv1-*

1048 *101;cle40-2*, *bam1-3*, *bam1-3;cle40-2*, *bam1-3;clv1-101*) at 4 WAG. **(B)** Leaf lengths were

1049 measured and plotted. Wild type (*Col-0* N=47), *cle40-2* (N=32) and *bam1-3;cle40-2* (N=29)

1050 mutant plants do not show a significant difference in leaf length to each other. While *bam1-3*

1051 (N=32) mutants exhibit in average significantly longer leaves than wild type plants, the single

1052 mutants *clv3-9* (N=33) and *clv1-101* (N=33) and the double mutants *clv1-101;cle40-2* (N=32)

1053 and *bam1-3;clv1-101* (N=45) show significantly shorter leaves. Statistical groups were

1054 assigned after calculating p-values by ANOVA and Turkey's multiple comparison test

1055 (differential grouping from  $p \leq 0.01$ ).



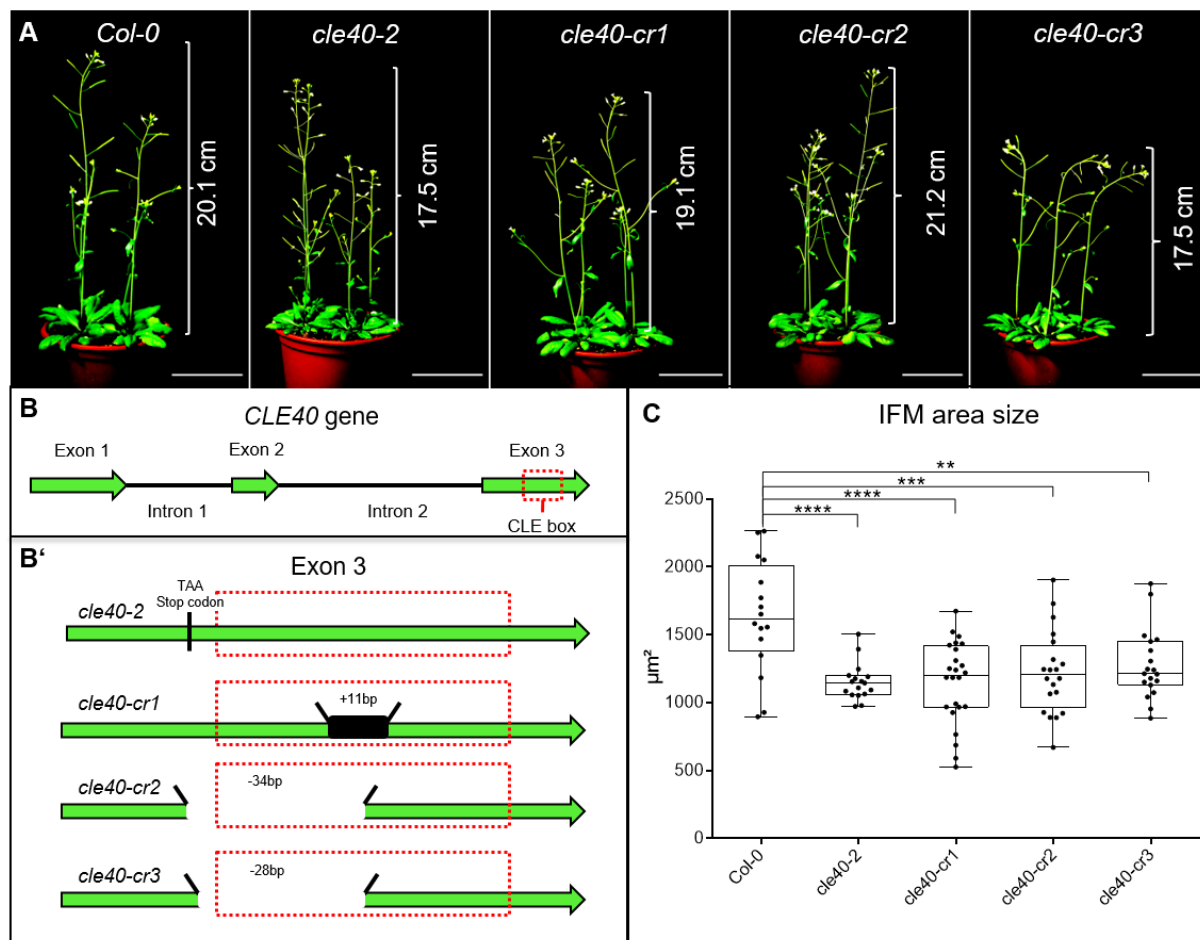

1056

1057 **Fig1-SupplFig.2: *cle40* mutants have smaller meristems**

1058 **(A)** Wild type *A. thaliana* plants (*Col-0*) and *cle40* mutants (*cle40-2*, *cle40-cr1*, *cle40-cr2*, *cle40-*  
1059 *cr3*) at 6 WAG. All plants show a similar height ranging from 17.5cm to 21.2cm and do not  
1060 have an obvious plant phenotype. **(B)** Schematic representation of the *CLE40* gene, consisting  
1061 of three exons (green arrows) and two introns. Exon 3 carries the crucial CLE box (dashed red  
1062 line). **(B')** Schematic representation of all four *cle40* mutations. All four lines have mutations in  
1063 or before the CLE box domain in Exon 3. *cle40-2* mutants were created by transposon  
1064 mutagenesis resulting in a stop codon in front of the CLE box (Stahl et al., 2009). *cle40-cr1*,  
1065 *cle40-cr2* and *cle40-cr3* mutants were created using the CRISPR-Cas9 method (Yamaguchi  
1066 et al., 2017). *cle40-cr1* has an 11bp insertion inside the CLE box domain while *cle40-cr2* and  
1067 *cle40-cr3* have a deletion of -34bp and -28bp within the CLE box. **(C)** At 6 WAG, IFMs of wild  
1068 type (*Col-0* N=16) and *cle40* mutant plants were dissected and the area of each meristem was  
1069 imaged and measured. All four *cle40* mutants show significantly reduced IFM sizes compared

1070 to *Col-0* plants (*cle40-2* N=17, *cle40-cr1* N=24, *cle40-cr2* N=20, *cle40-cr3* N=19). Statistical  
 1071 stars were assigned after calculating p-values by ANOVA and Dunnett's multiple comparison  
 1072 test (differential grouping from  $p \leq 0.01$ ).  
 1073

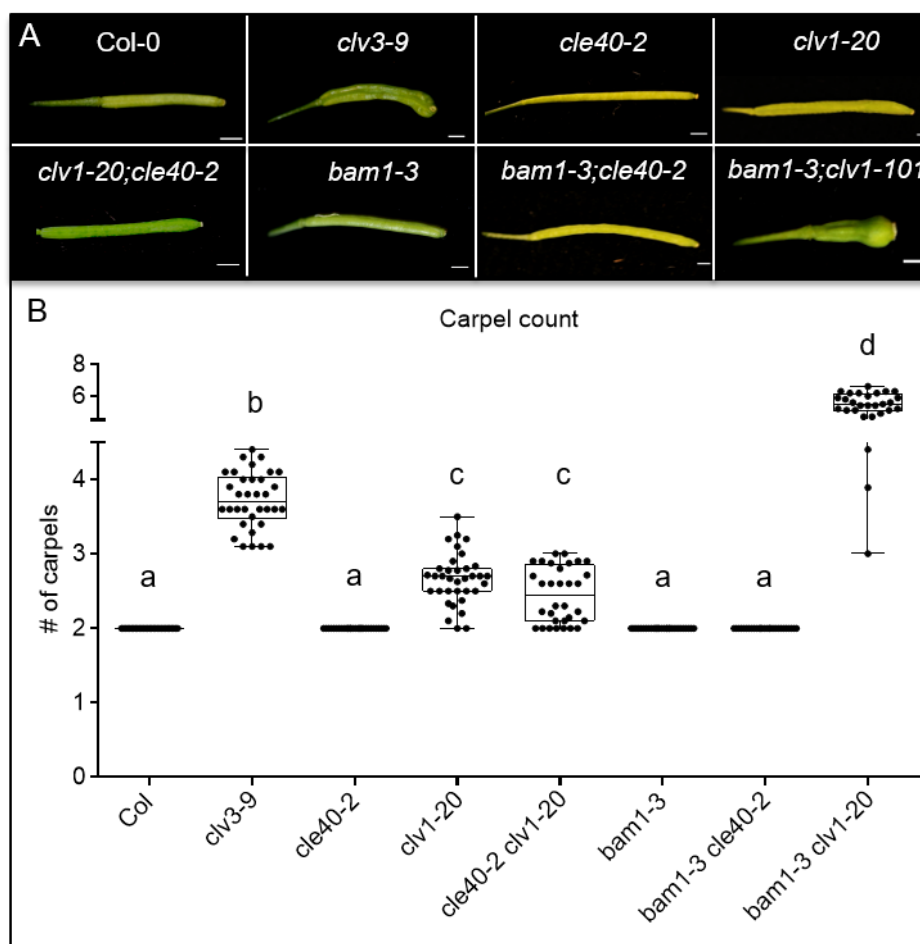

1074

1075 **Fig1-SupplFig.3: Siliques of various mutants differ in their carpel number**

1076 **(A)** Carpels of *Arabidopsis thaliana* plants at 6 WAG in wild type (*Col-0*) or different mutant  
 1077 backgrounds: *clv3-9*, *cle40-2*, *clv1-20*, *clv1-20;cle40-2*, *bam1-3*, *bam1-3;cle40-2*,  
 1078 *bam1-3;clv1-101*. **(B)** Carpel number was counted and plotted. Wild type (*Col-0* N=290), *cle40-*  
 1079 *2* (N=300), *bam1-3* (N=300) and *bam1-3;cle40-2* (N=280) mutant plants always develop two  
 1080 carpels, while *clv3-9* (N=340) plants exhibit 3 to 5 carpels and *clv1-20* (N=350) and *clv1-*  
 1081 *20;cle40-2* (N=320) mutants show in average 2 to 3 carpels. The double mutant *bam1-3;clv1-*  
 1082 *20* (N=280) develops 6 carpels in average. N number depicts number of siliques. Statistical



1083 groups were assigned after calculating p-values by ANOVA and Turkey's multiple comparison  
1084 test (differential grouping from  $p \leq 0.01$ ).  
1085

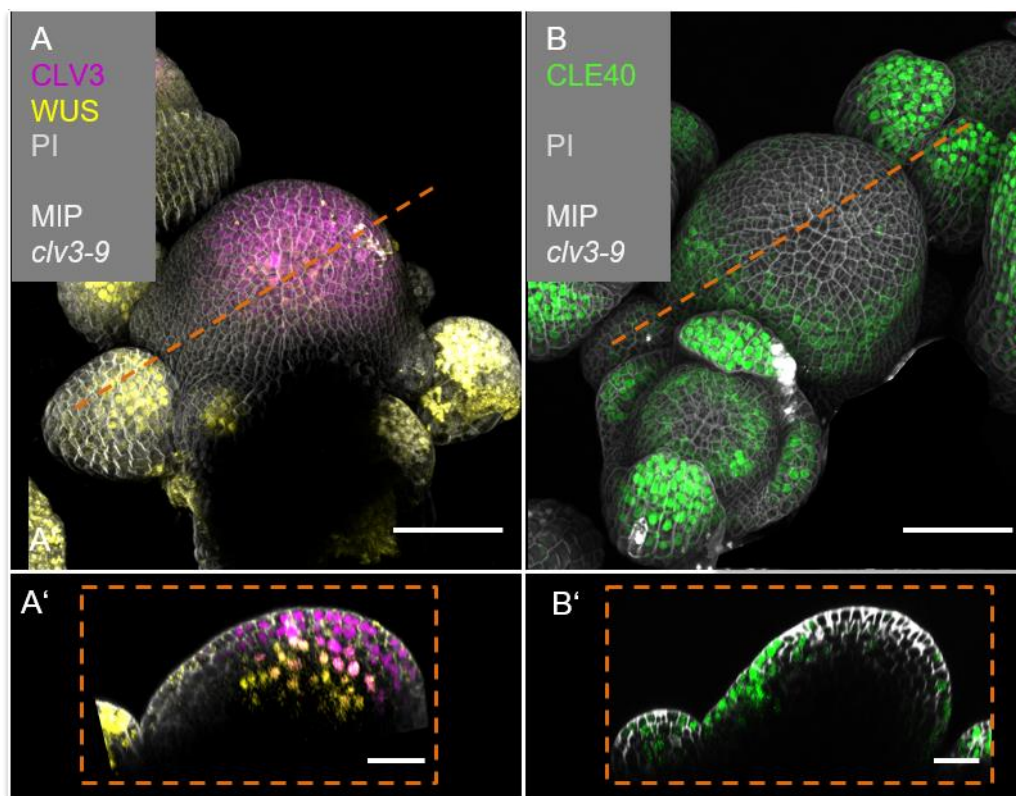

1086

1087 **Fig3-SupplFig.1: *CLE40* expression is lacking in the CZ and OC**

1088 **(A)** MIP of *CLV3* and *WUS* expression (*CLV3:NLS-mCherry;WUS:NLS-GFP//clv3-9*) in a  
1089 *clv3-9* mutant IFM (N=5). *CLV3* expression is detected at the tip of the meristem, while *WUS*  
1090 expression is predominantly found in young primordia surrounding the meristem. **(A')** Optical  
1091 section through the IFM shows an extended expression domain of *CLV3* in the CZ and *WUS*  
1092 expressing cells in OC of the IFM. **(B)** MIP of a *clv3-9* mutant IFM expressing  
1093 *CLE40:Venus-H2B*. *CLE40* is expressed in the PZ of the IFM, in flower primordia and in mature  
1094 sepals (N=6). **(B')** Optical section through the IFM shows *CLE40* expression in the outer layers  
1095 of the PZ while it is lacking in the CZ and OC, where *CLV3* and *WUS* are expressed.

1096 Dashed orange line indicates the planes of optical sections; Scale bars: 50µm (C, D), 10µm  
1097 (C', D'), MIP = maximum intensity projection, PI = propidium iodide

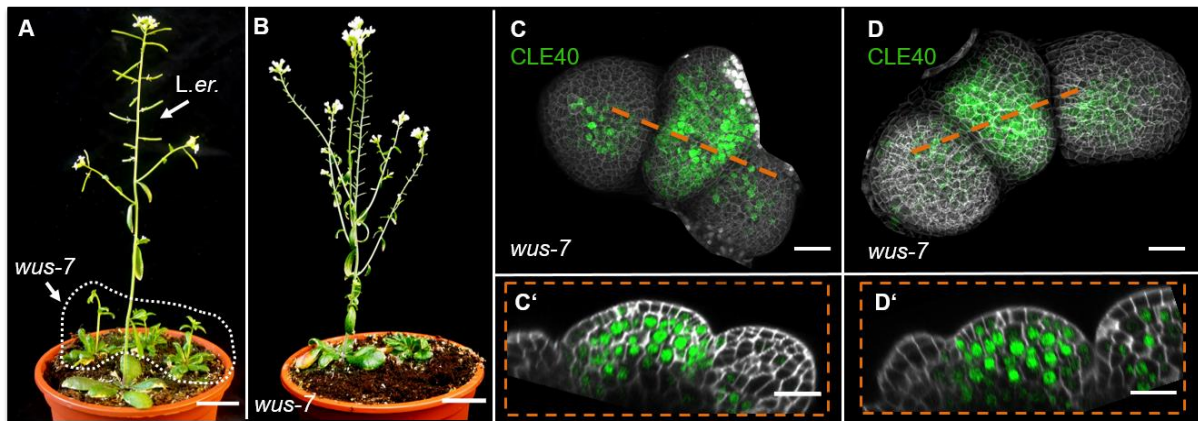

1098

1099 **Fig3-SupplFig.2: *CLE40* expression is extended in *wus-7* mutants**

1100 **(A)** *L.er.* wild type plant at 5 WAG shows normal plant growth, while *wus-7* mutants at 5 WAG  
1101 are delayed in their development (dashed white line). **(B)** *wus-7* mutant at 8 WAG. *wus-7*  
1102 mutants develop IFMs but give rise to sterile flowers that lack inner organs. **(C and D)** MIP of  
1103 *wus-7* IFMs at 5 WAG expressing *CLE40:Venus-H2B*. *CLE40* expression is detected through  
1104 the entire meristem and in the centre of primordia (N=12). **(D' and D')** Optical sections through  
1105 the meristem show *CLE40* expression in an extended pattern in the PZ and the OC.  
1106 Dashed white line in B encloses homozygous *wus-7* mutants, dashed orange line indicates  
1107 the planes of optical sections; Scale bars: 20mm (A, B), 20µm (C-D')

1108

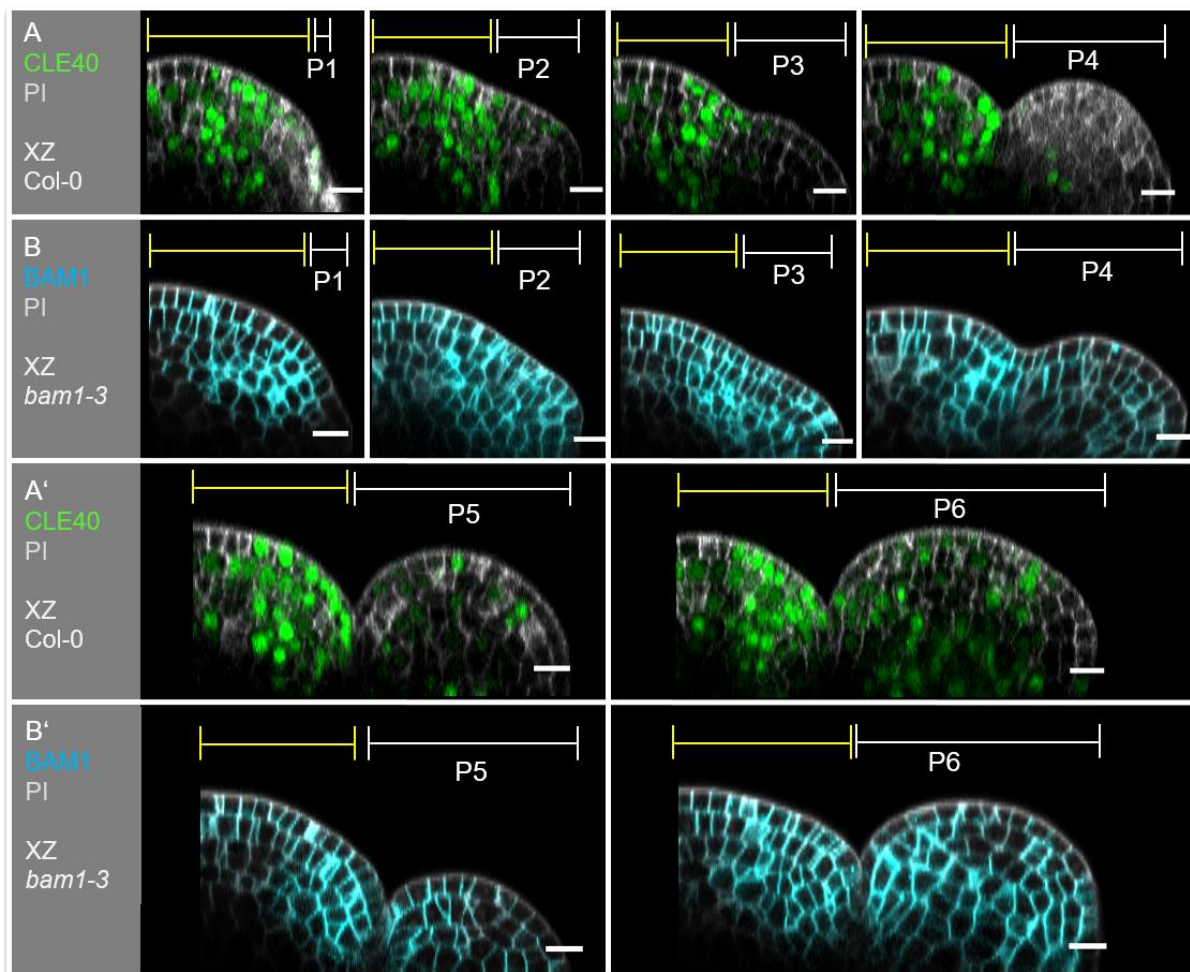

1109

1110 **Fig6-SupplFig. 1 Expression patterns of *CLE40* and *BAM1* overlap in the IFM**

1111 Optical sections through an IFM and its developing primordia P1 to P6 expressing either **(A)**

1112 *CLE40* (*CLE40:Venus-H2B*) (N=23) or **(B)** *BAM1* (*BAM1:BAM1-GFP*) (N=15). In the IFM,

1113 *CLE40* and *BAM1* expression patterns overlap in the PZ, while both genes are lacking in the

1114 OC. No *CLE40* expression is detected in young primordia in P1 to P3. From P4 on a faint

1115 signal in CZ of the primordia express *CLE40*. Its expression expands in P5 and can be found

1116 in almost all cells of P6. *BAM1* is expressed ubiquitously in all primordia from P2 to P6.

1117 Yellow lines (P1 to P6) indicate the IFM region, white lines (P1 to P6) mark the primordium,

1118 Scale bar: 10 $\mu$ m, P = primordium

1119



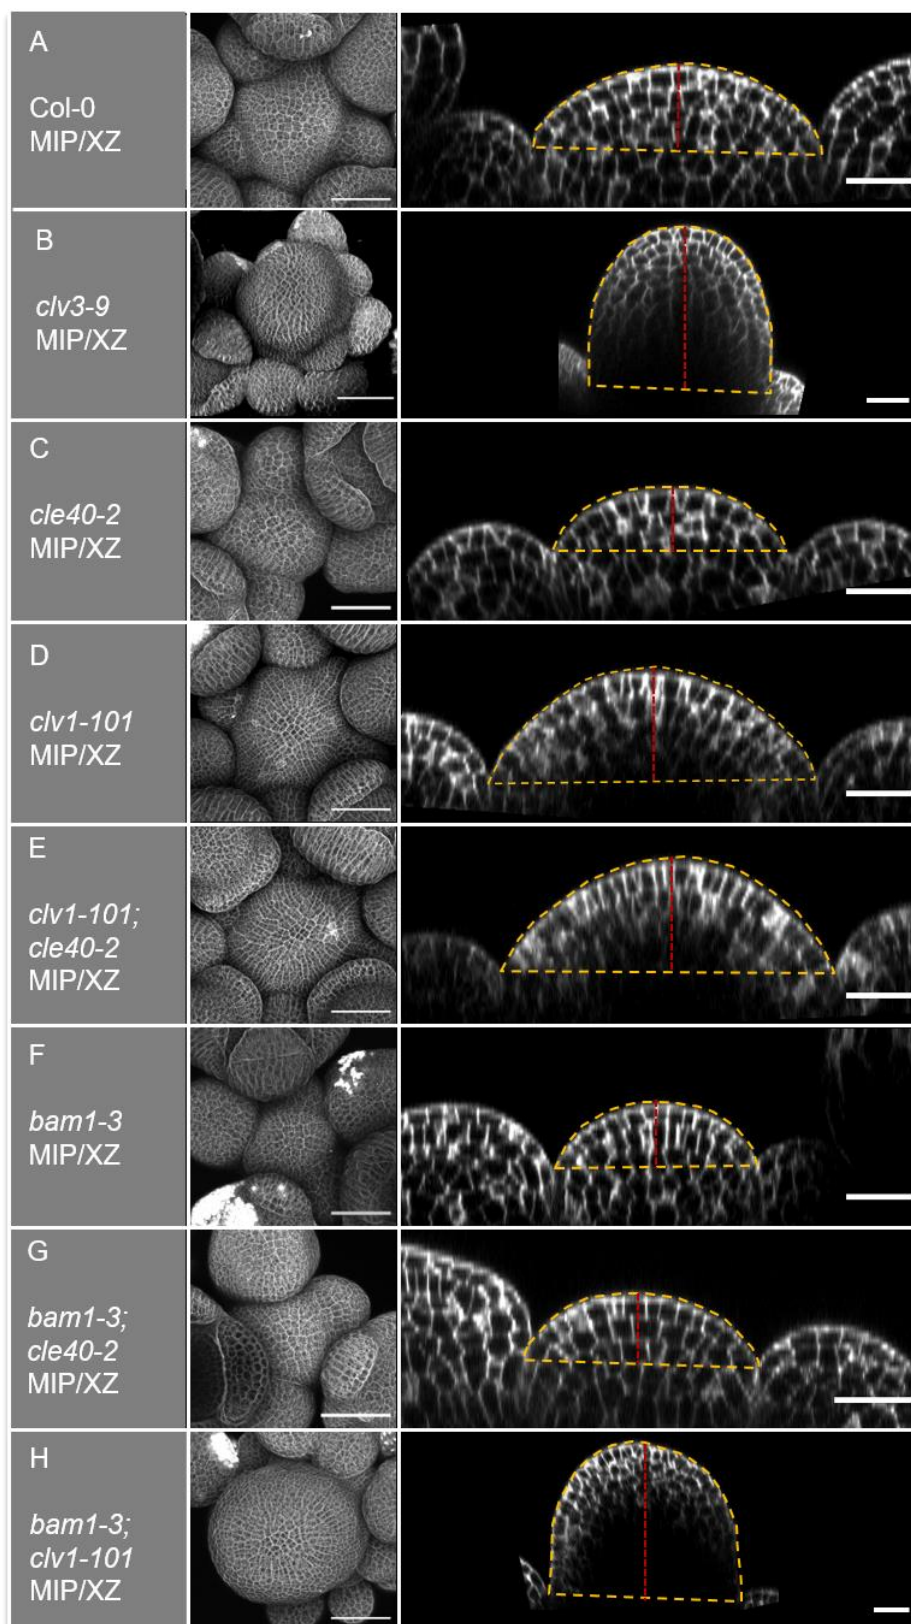

1120

1121 **Fig6-SupplFig. 2: Meristem measurements in mutant backgrounds**

1122 IFMs of (A) *Col-0*, (B) *clv3-9*, (C) *cle40-2*, (D) *clv1-101*, (E) *clv1-101;cle40-2*, (F) *bam1-3*, (G)

1123 *bam1-3,cle40-2* and (H) *bam1-3;clv1-101* were imaged after 6 WAG. Z-stacks were taken from

1124 the top of the IFMs with a confocal microscope. A MIP and an optical section from P4 to P5  
 1125 was performed for each meristem.  
 1126 The yellow dashed line depicts the area of the meristem that was measured and the dashed  
 1127 red line indicates the height of the meristems. Scale bar: 20 $\mu$ m  
 1128  
 1129

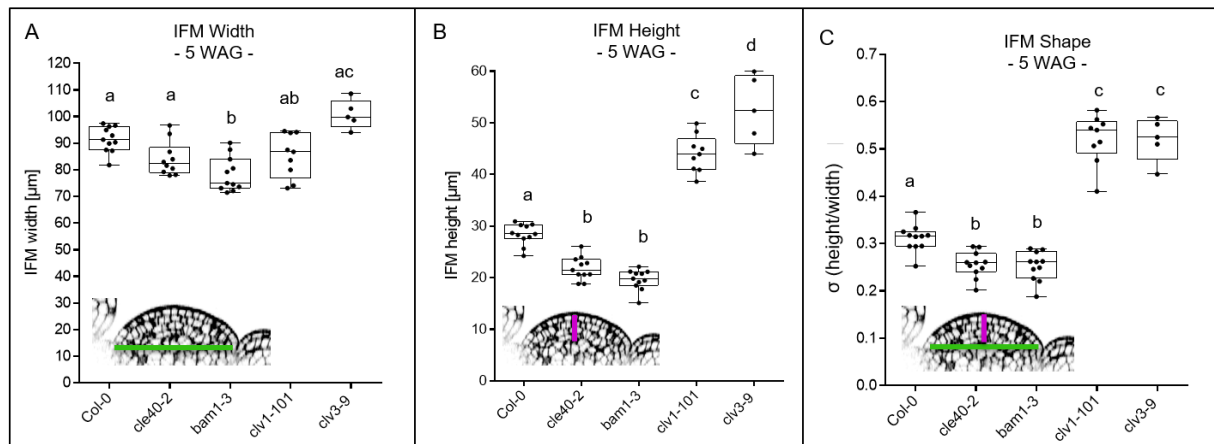

1130

1131 **Fig7-SupplFig. 1: IFM height, width and shape after 5 WAG**

1132 **(A)** The width of *Col-0* (N=11), *cle40-2* (N=10), *bam1-3* (N=11), *clv1-101* (N=9) and *clv3-9*  
 1133 (N=5) mutants at 5 WAG does not significantly differ from each other. The average width lays  
 1134 between 85 to 100 $\mu$ m. Wild type plants are in average 90 $\mu$ m wide while *clv3-9* mutants depict  
 1135 the widest meristem average of 100 $\mu$ m. Only *bam1-3* mutants have with an average of 79 $\mu$ m  
 1136 a significantly smaller meristem wide compared to wild type plants. **(B)** The height of *cle40-2*  
 1137 (~22 $\mu$ m) and *bam1-3* (~23 $\mu$ m) mutants is significantly shorter after 5 compared to wild type  
 1138 plants (~28 $\mu$ m). In contrast, *clv1-101* and *clv3-9* have significantly higher meristems than *Col-*  
 1139 *0*, *cle40-2* and *bam1-3* mutants. **(C)** The  $\sigma$ -value represents the shape of the meristem and is  
 1140 defined by the quotient of height and width. *cle40-2* and *bam1-3* mutants have a significantly  
 1141 smaller  $\sigma$ -value compared to wild type plants, resulting in flatter meristems. *clv1-101* and *clv3-*  
 1142 *9* have with an average of 0.55 a significantly higher  $\sigma$ -value and thus have more dome-shaped  
 1143 meristems.

1144 Green line in the inset meristem in (A) indicates the width that was used for the quantifications  
 1145 in (A); magenta line in the inset meristem in (B) indicates the height that was used for the  
 1146 quantifications in (B); green and magenta line in the inset meristem in (C) indicates the width  
 1147 and height that was used for the quantifications in (C),  
 1148  
 1149

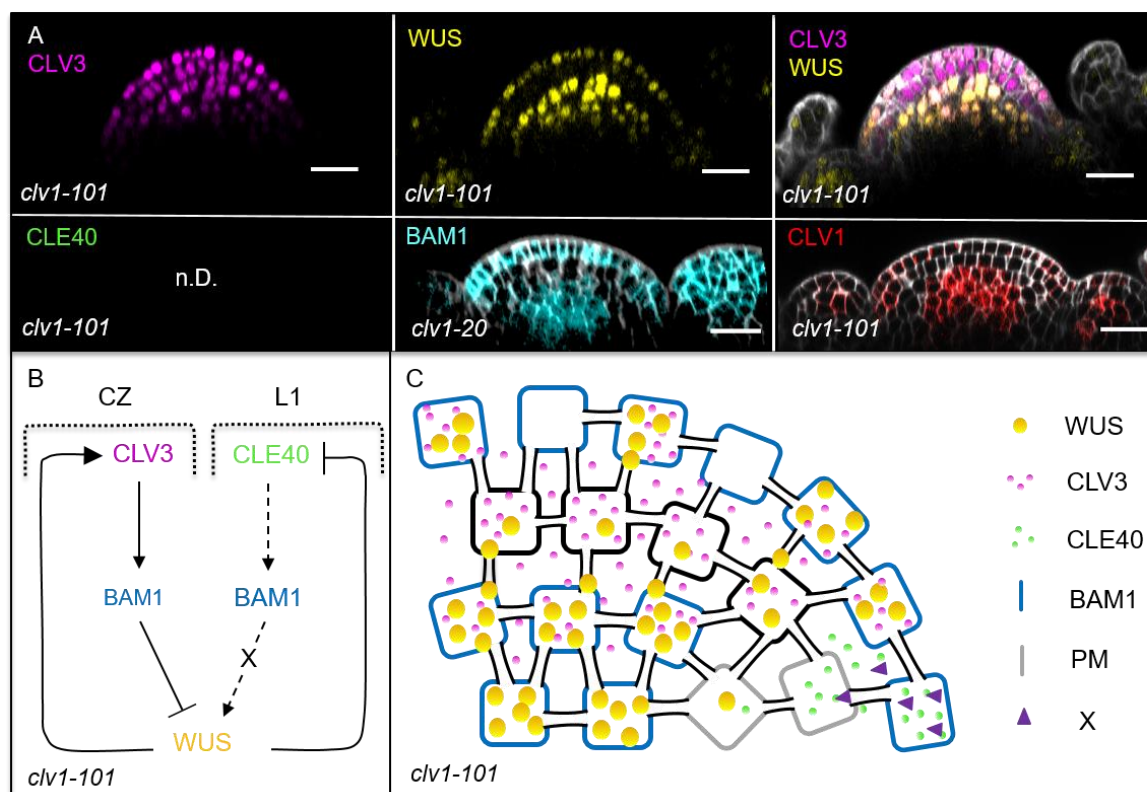

1150  
 1151 **Fig8-SupplFig. 1: Schematic model of the two intertwined signaling pathways in a**  
 1152 ***clv1-101* mutant background**

1153 **(A)** Optical sections of through IFMs show the expression patterns of *CLV3* (N=8), *WUS* (N=8),  
 1154 *BAM1* (N=9) and *CLV1* (N=5) in a *clv1* mutant. Compared to wild type plants, the expression  
 1155 of *CLV3* and *WUS* is expanded and *WUS* is found in a patchy pattern in the L1. *BAM1*  
 1156 expression shifts to the CZ and is found in an elevated expression in the L1. **(B and C)**  
 1157 Schematic representation of two intertwined negative feedback loops in the IFM of a *clv1-101*  
 1158 mutant. The lack of *CLV1* leads to a shift of *BAM1* expression to the OC and to an elevated  
 1159 expression in the L1. In the L3, *BAM1* can partly substitute for *CLV1* and thus *CLV3* can act



1160 via *BAM1* in order to repress *WUS* activity. The elevated expression of *BAM1* in the L1  
 1161 overlaps in very few cells with *CLE40* expression in the periphery and leads to a weak  
 1162 activation of the downstream signal “X” that promotes *WUS* activity. Since, *WUS* expression  
 1163 is only partly repressed by the *CLV3-BAM1* signalling pathway, the *WUS* domain is extended  
 1164 and leads to an increase in stem cells (expanded *CLV3* expression). *WUS* is now also detected  
 1165 in the L1 of the meristem, together with *BAM1* expression. Scale bars: 20µm (A), CZ =central  
 1166 zone, L1 =layer 1  
 1167  
 1168

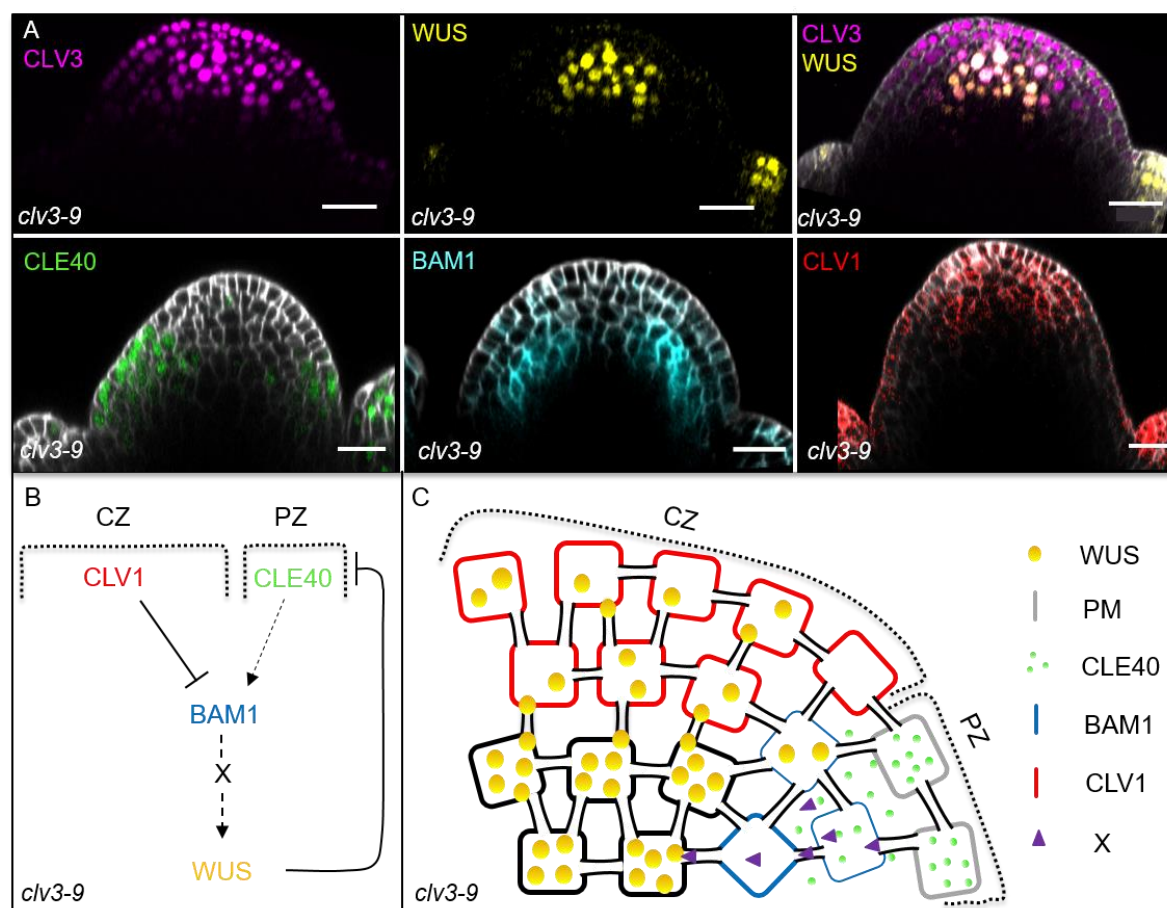

1169  
 1170 **Fig8-SupplFig. 2: Schematic model of the intertwined signalling pathways in a *clv3-9***  
 1171 **mutant background**

1172 **(A)** Optical sections of through IFMs show the expression patterns of *CLV3* (N=5), *WUS* (N=5),  
 1173 *CLE40* (N=6), *BAM1* (N=5) and *CLV1* (N=5) in a *clv3-9* mutant. Compared to wild type plants,  
 1174 the meristem is highly increased in its size along the apical-basal axis and the expression of

1175 *CLV3* and *WUS* is expanded in the CZ and OC. *CLE40* expression is limited to the outer layers  
1176 of the meristems' periphery and excluded from the CZ and OC, while *BAM1* expression shifts  
1177 towards the inner layers of the PZ. *CLV1* expression is found at the tip and not in the centre of  
1178 the fasciated meristem. **(B and C)** Schematic representation of two intertwined negative  
1179 feedback loops in the IFM of a *clv3-9* mutant. The lack of *CLV3* leads to a fasciated meristem  
1180 with increased number of stem cells and thus an expanded CZ and a decreased PZ. Since no  
1181 *CLV3* peptide is available, *CLV1* is not activated and expression of *CLV1* shifts from the OC  
1182 to the tip of the CZ, where it represses *BAM1* expression. *BAM1* is expressed in the inner  
1183 layers of the PZ, while *CLE40* expression is found in the outer layers of the PZ since it is  
1184 repressed by the expanded *WUS* domain in the centre of the meristem. Thus only very few  
1185 cells express both, *BAM1* and *CLE40* and hence, nearly no *WUS* promoting factor "X" is  
1186 produced and the *CLV3-CLV1* signaling pathway does not repress *WUS* activity. Scale bars:  
1187 20µm (A), CZ = central zone, PZ = peripheral zone  
1188

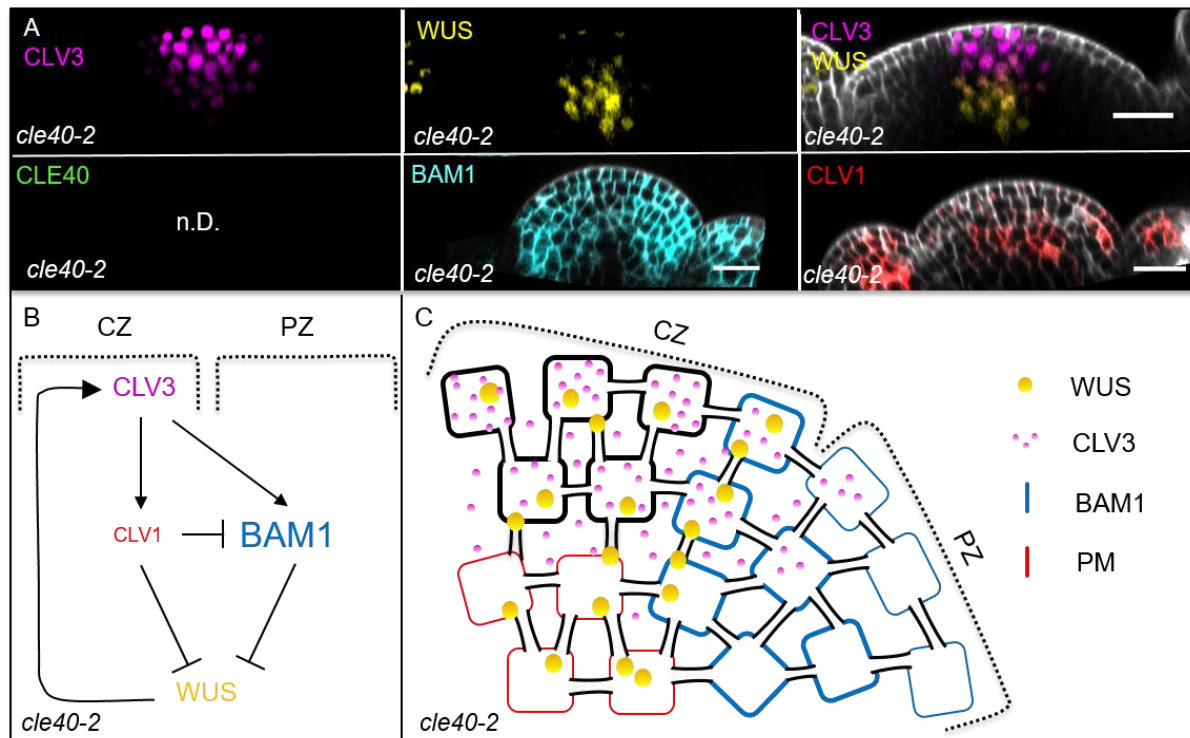

1189

1190 **Fig8-SupplFig. 3: Schematic model of the intertwined signalling pathways in a *cle40-2***  
 1191 **mutant background**

1192 **(A)** Optical sections of through IFMs show the expression patterns of *CLV3* (N=9), *WUS* (N=9),  
 1193 *BAM1* (N=7) and *CLV1* (N=9) in a *cle40-2* mutant. *CLV3* expression is similar to wild type  
 1194 plants, in the CZ. *WUS* expression is found in the OC, but in less cells than in *Col-0* plants.  
 1195 *BAM1* expression appears to be broader compared to wild type plants, while *CLV1* expression  
 1196 seems to be decreased in its intensity. **(B and C)** Schematic representation of two intertwined  
 1197 negative feedback loops in the IFM of a *cle40-2* mutant. In *cle40-2* mutants, *CLV1* expression  
 1198 seems to be decreased and leads to a broader *BAM1* expression compared to wild type plants.  
 1199 Since expression of *BAM1* is now also found in the CZ, *CLV3* is able to bind *CLV1* and *BAM1*  
 1200 in the OC and CZ (respectively), leading to a double repression signalling cascade from the  
 1201 centre of the meristem. In the PZ, the downstream signaling cascade of *BAM1* is not activated  
 1202 through *CLE40* and thus the *WUS* promoting factor “X” is not being expressed and the *WUS*  
 1203 domain is confined to the centre of the OC.

1204 Scale bars: 20µm (A), CZ = central zone, PZ = peripheral zone

1205

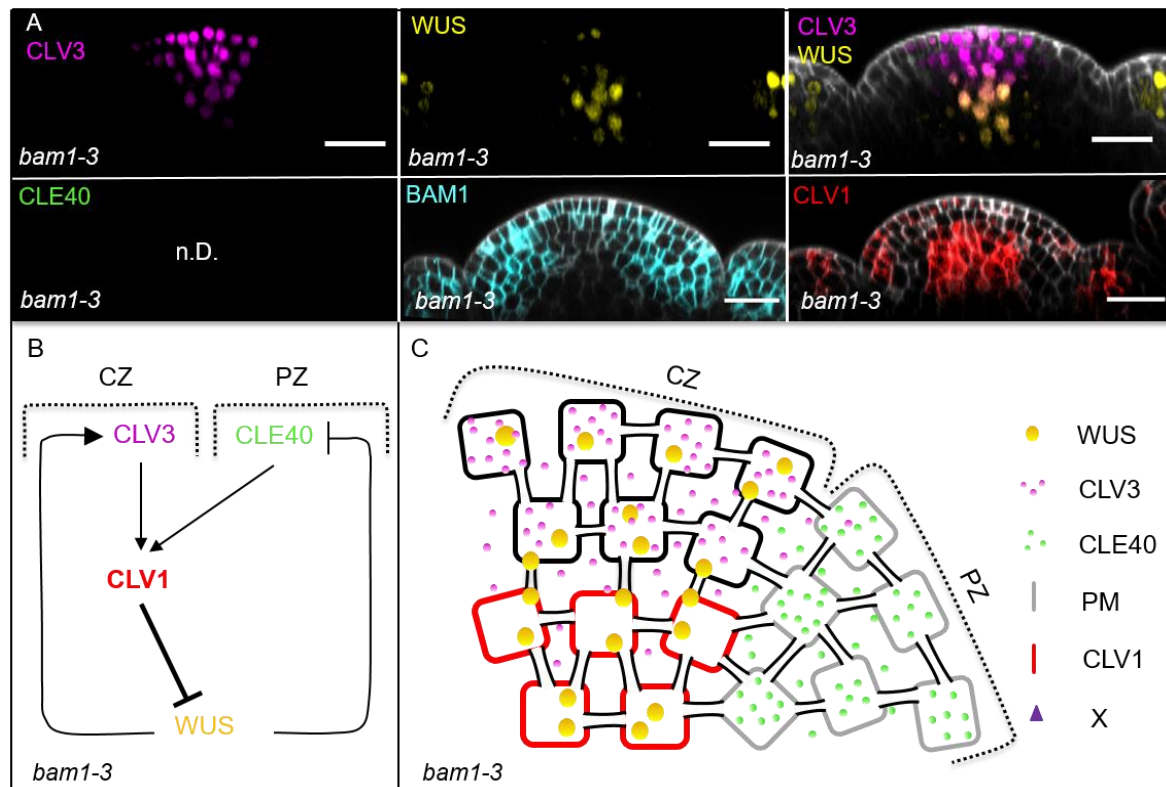

1206

1207 **Fig8-SupplFig. 4: Schematic model of the intertwined signalling pathways in a *bam1-3***  
 1208 **mutant background**

1209 **(A)** Optical sections of through IFMs show the expression patterns of *CLV3* (N=9), *WUS* (N=9),  
 1210 *BAM1* (N=15) and *CLV1* (N=7) in a *bam1-3* mutant. *CLV3* expression is similar to wild type  
 1211 plants, at the tip of the meristem in a cone shaped domain. *WUS* expression is found in the  
 1212 OC, but in less cells than in *Col-0* plants. *CLV1* expression seems to be increased in its intensity  
 1213 compared to wild type plants. **(B and C)** Schematic representation of two intertwined negative  
 1214 feedback loops in the IFM of a *bam1-3* mutant. In *bam1-3* mutants, *CLV1* expression appears  
 1215 to be increased. Since *BAM1* is lacking in the periphery, the *WUS* promoting diffusion factor  
 1216 “X” is not being produced and thus *WUS* expression is decreased and confined to the centre  
 1217 of the OC, similar to *cle40-2* plants. With the loss of *BAM1*, the main receptor for *CLE40* is  
 1218 missing, and thus *CLE40* peptide now might signal through *CLV1* leading to a stronger  
 1219 repression of *WUS* from the centre of the meristem.

1220 Scale bars: 20µm (A), CZ = central zone, PZ = peripheral zone

1221





|      |                                                                                              |    |
|------|----------------------------------------------------------------------------------------------|----|
| 1253 | Fig8-SupplFig. 3: Schematic model of the intertwined signalling pathways in a <i>cle40-2</i> |    |
| 1254 | mutant background                                                                            | 65 |
| 1255 | Fig8-SupplFig. 4: Schematic model of the intertwined signalling pathways in a                |    |
| 1256 | <i>bam1-3</i> mutant background                                                              | 66 |
| 1257 |                                                                                              |    |

1258 **List of Tables**

|      |                                                                                           |    |
|------|-------------------------------------------------------------------------------------------|----|
| 1259 | Tab. 1: Chemicals and substances used in this study.                                      | 37 |
| 1260 | Tab. 2: Mutants analysed in this study.                                                   | 38 |
| 1261 | Tab. 3: Primers and methods used for genotyping.                                          | 39 |
| 1262 | Tab. 4: Entry vectors used for cloning.                                                   | 40 |
| 1263 | Tab. 5: Destination vectors used to generate transgenic <i>A.thaliana</i> reporter lines. | 41 |
| 1264 | Tab. 6: Primers used for cloning the entry vectors.                                       | 41 |
| 1265 | Tab. 7: Arabidopsis lines that were analysed in this study.                               | 42 |
| 1266 | Tab. 8: Microscopy settings used for imaging.                                             | 43 |
| 1267 |                                                                                           |    |
